# Supplementary material for: Genome-Wide Association Studies of 39 Seed Yield-Related Traits in Sesame (Sesamum indicum L.)
Source: MDPI journal article supplement (doi:10.3390/ijms19092794), 2018-09-17

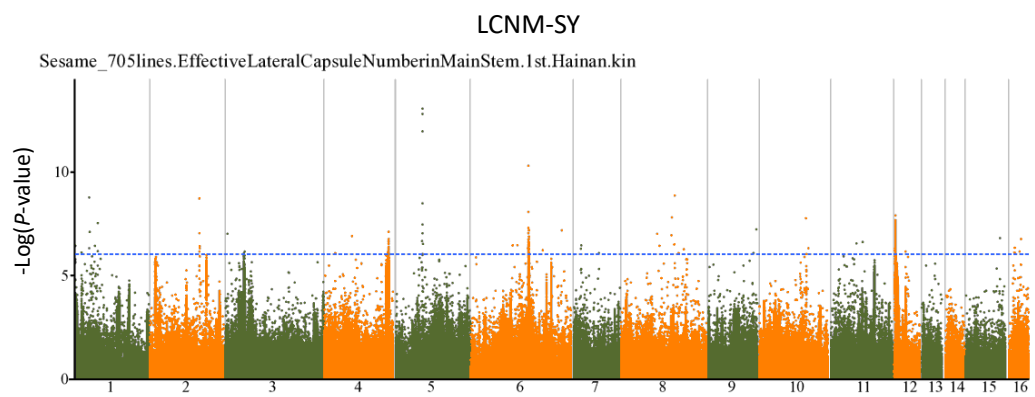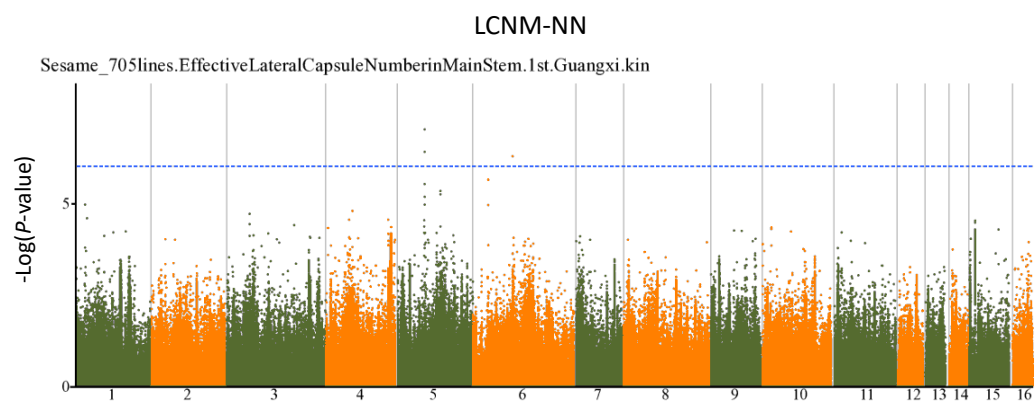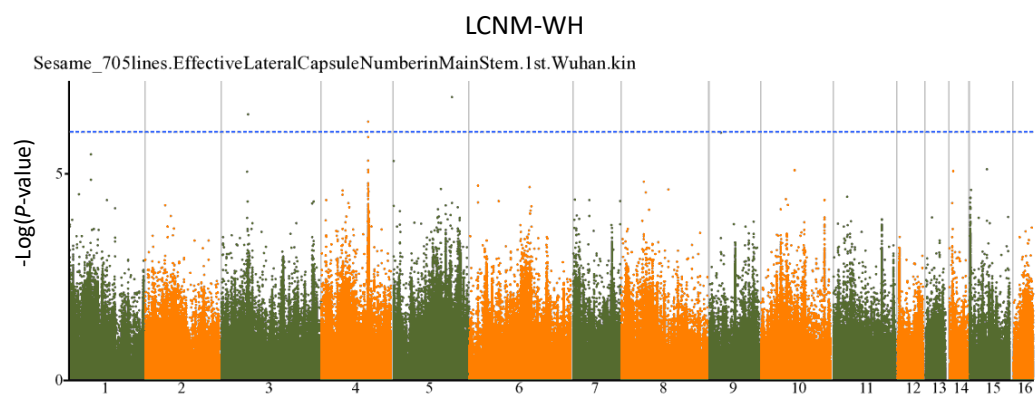

### CPMB-SY

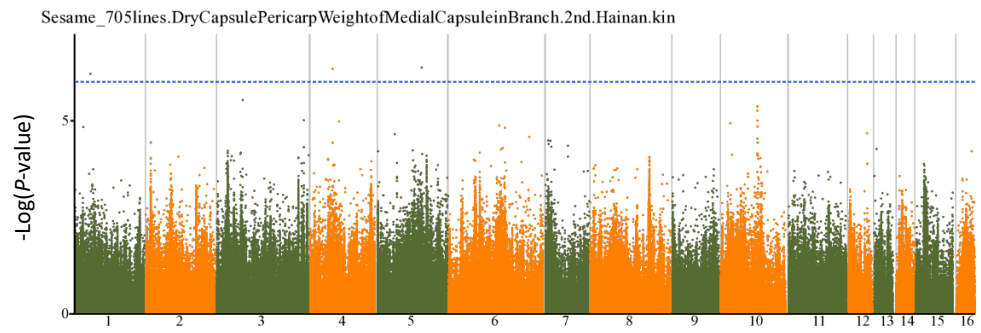

### CPMB-NN

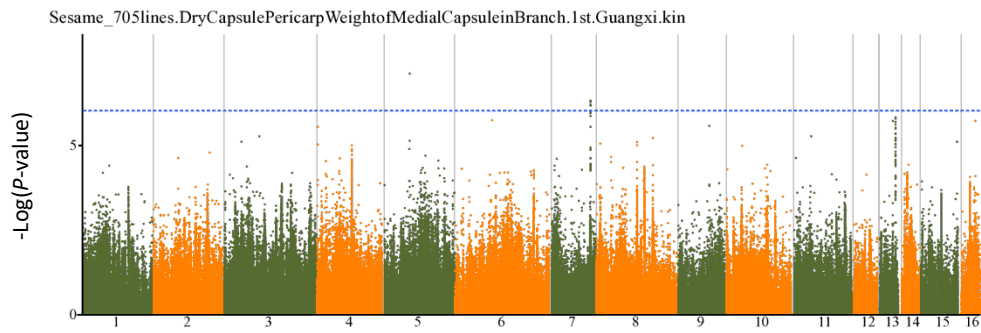

### CPMB-WH

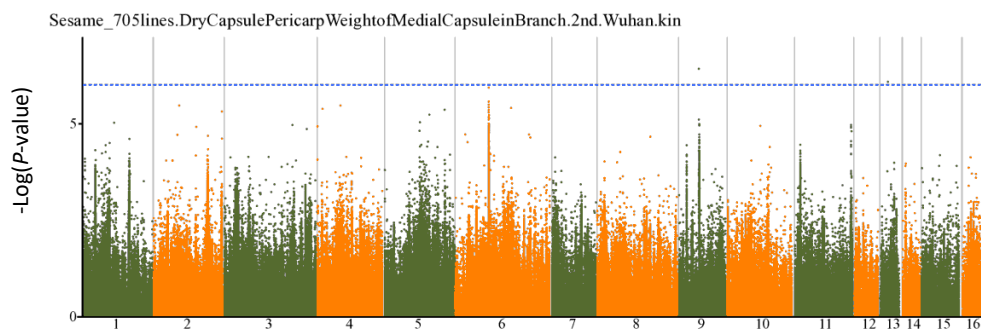

### CPLM-SY

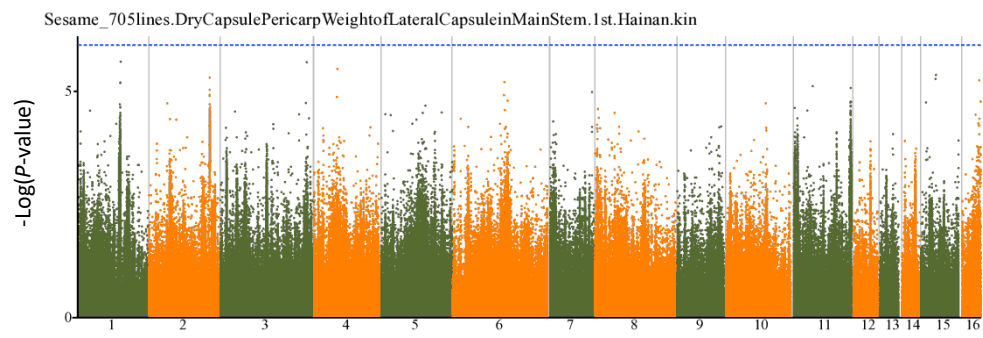

### CPLM-NN

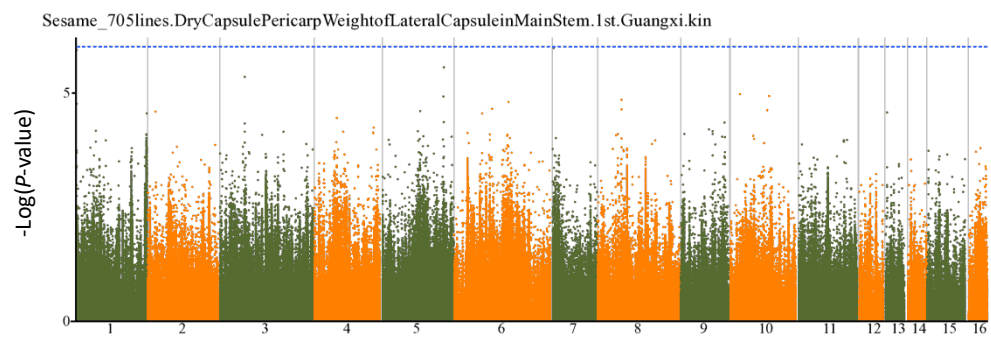

### CPLM-WH

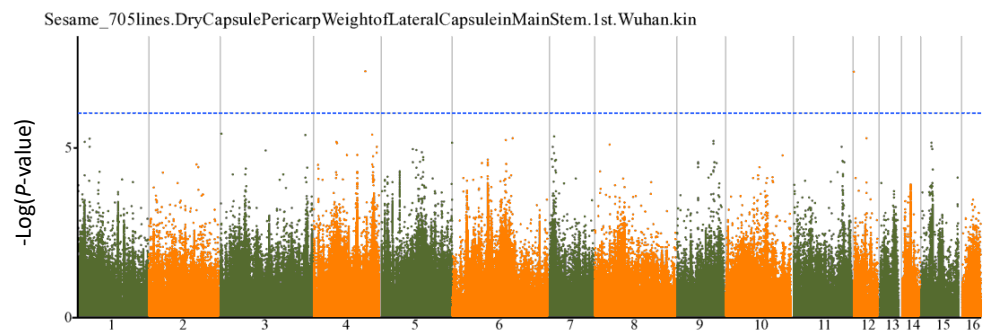

### CPMM-SY

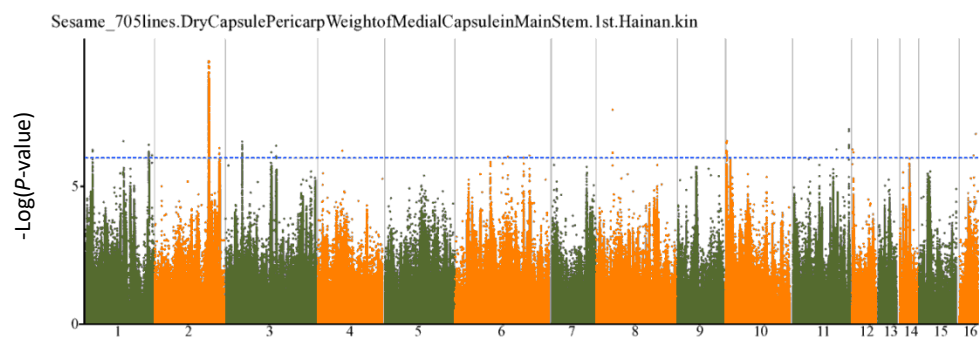

### CPMM-NN

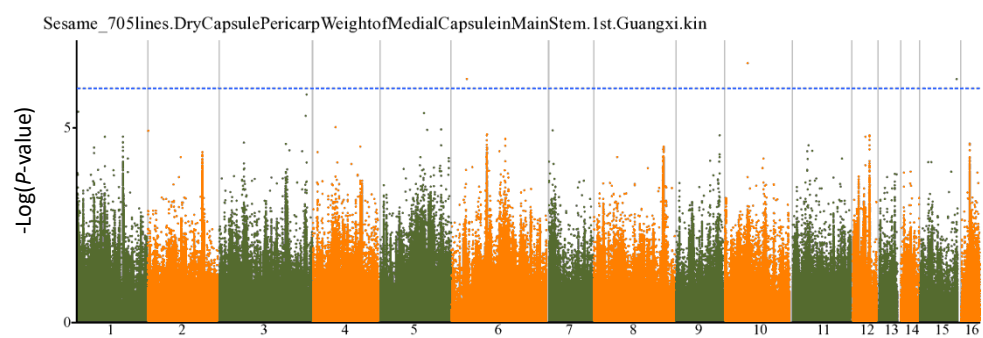

### CPMM-WH

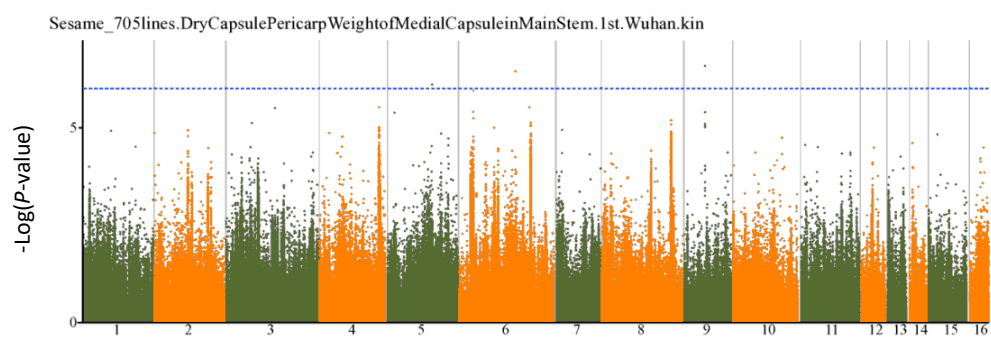

### SWLB-SY

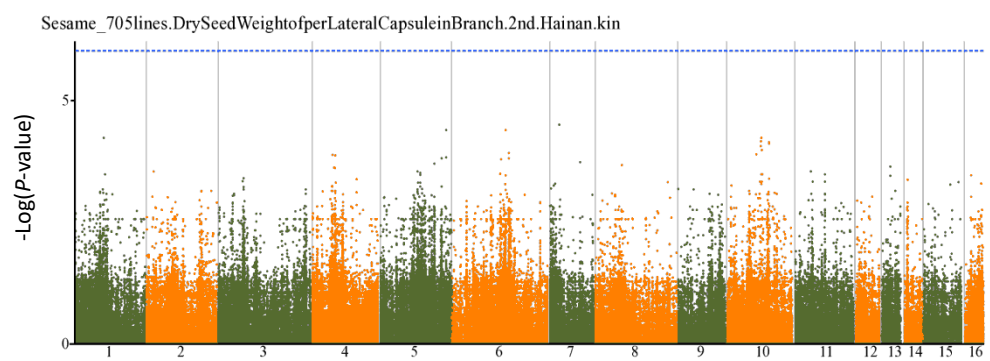

### SWLB-NN

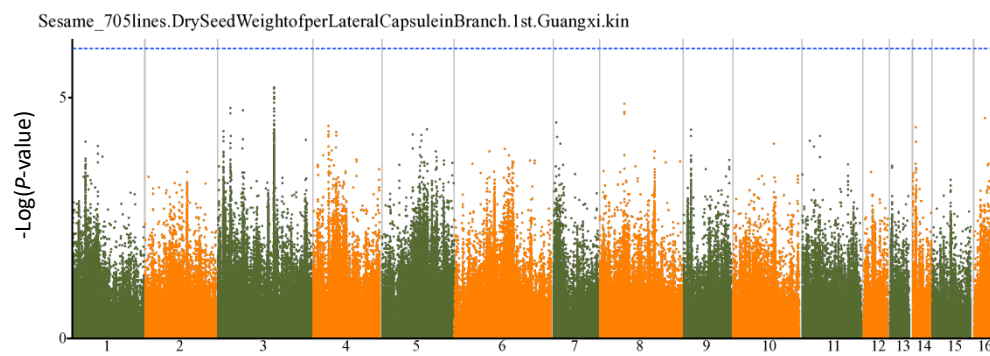

### SWLB-WH

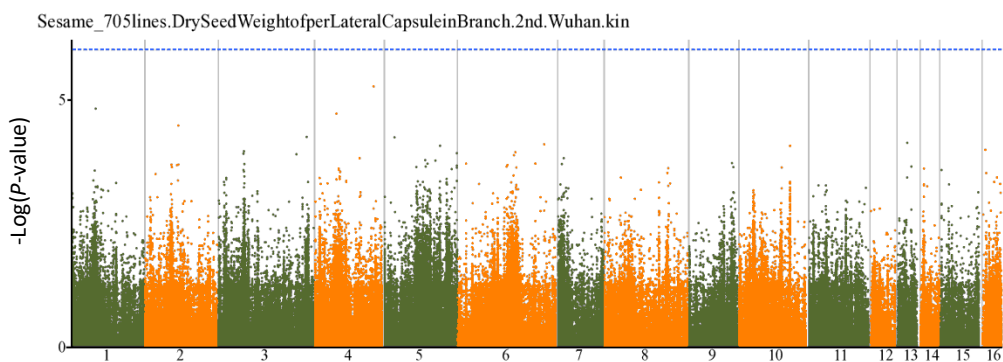

### SWLM-SY

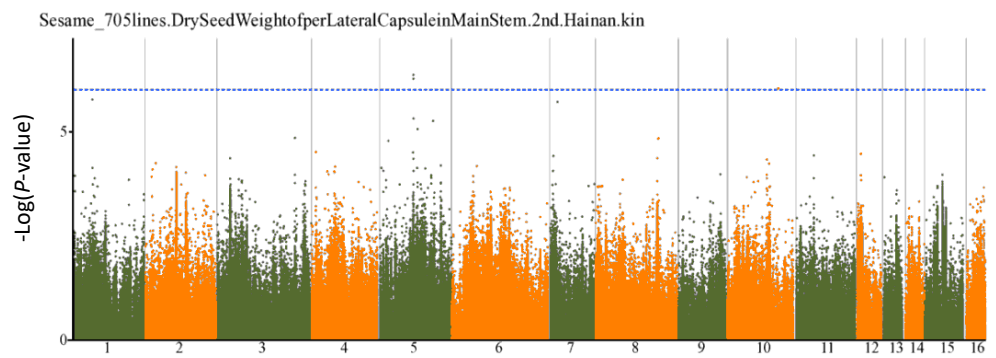

### SWLM-NN

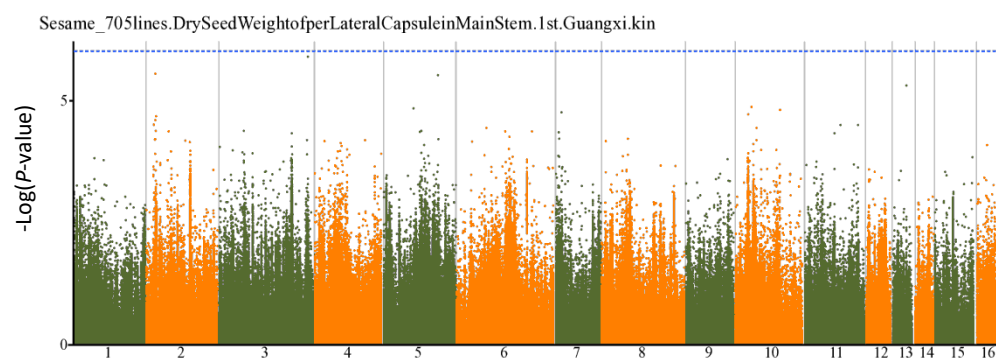

### SWLM-WH

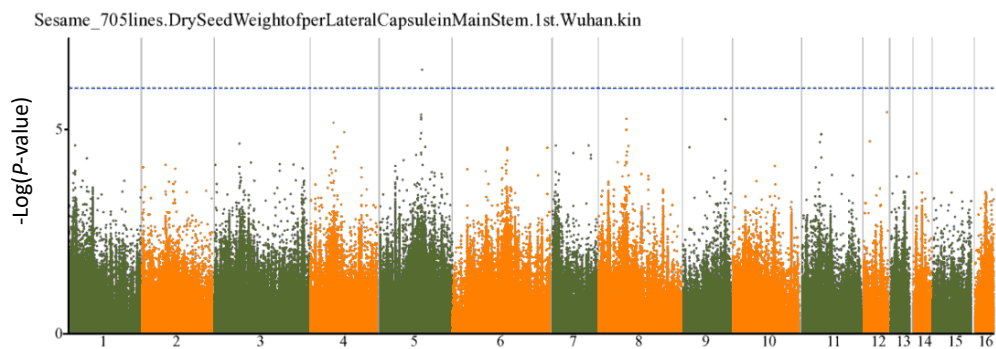

### SWMB-SY

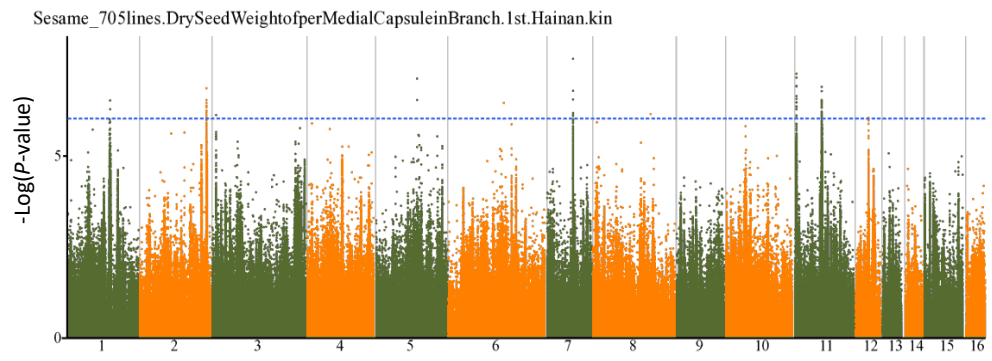

### SWMB-NN

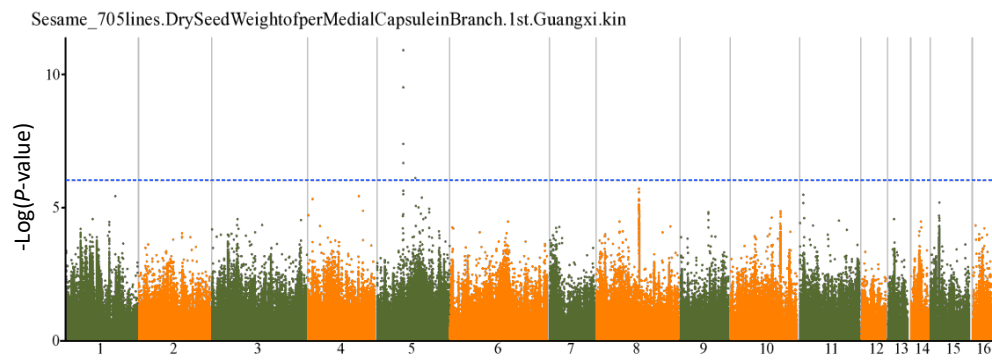

### SWMB-WH

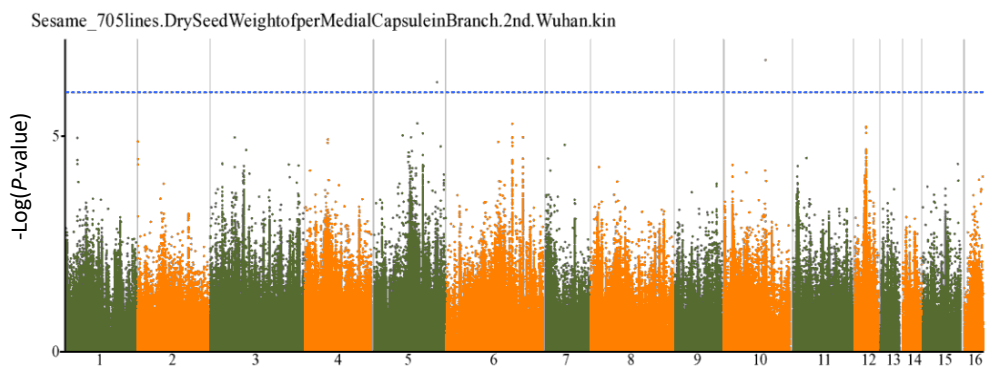

### SWMM-SY

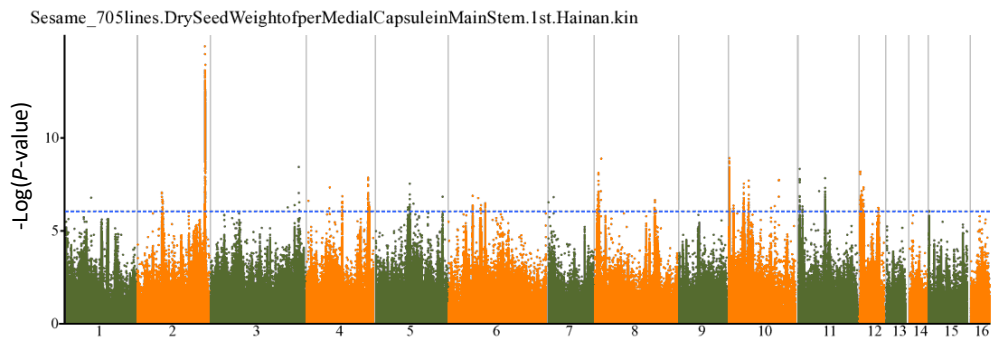

### SWMM-NN

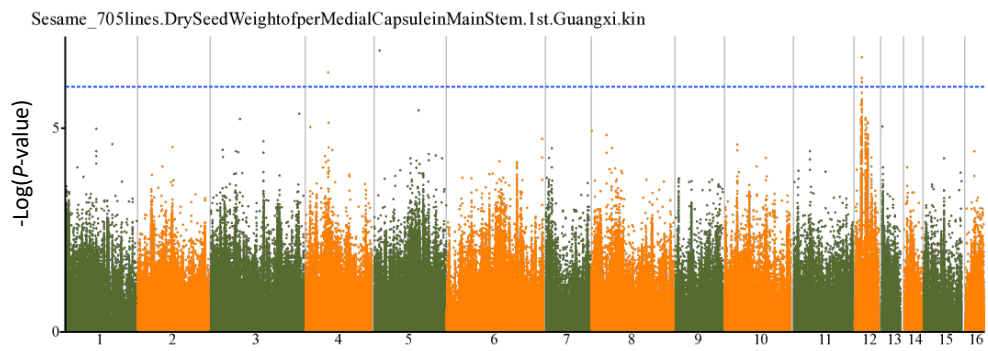

### SWMM-WH

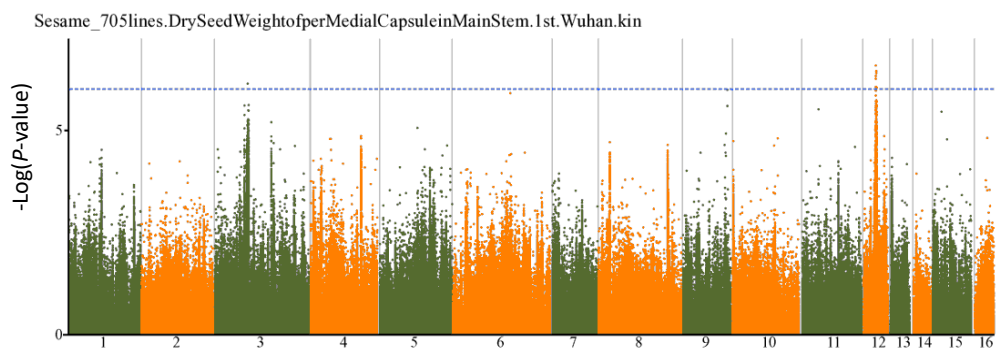



### CNB-SY

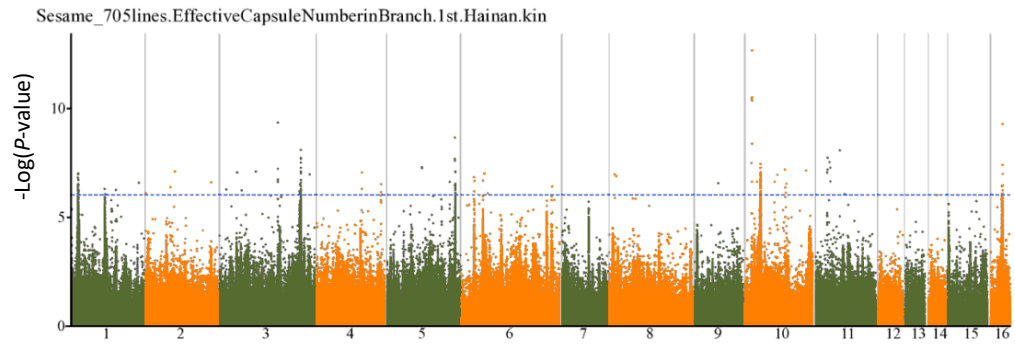

### CNB-NN

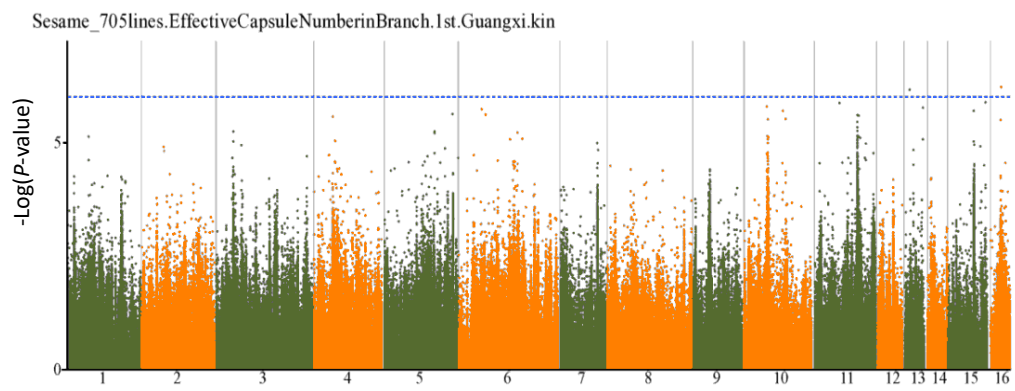

### CNB-WH

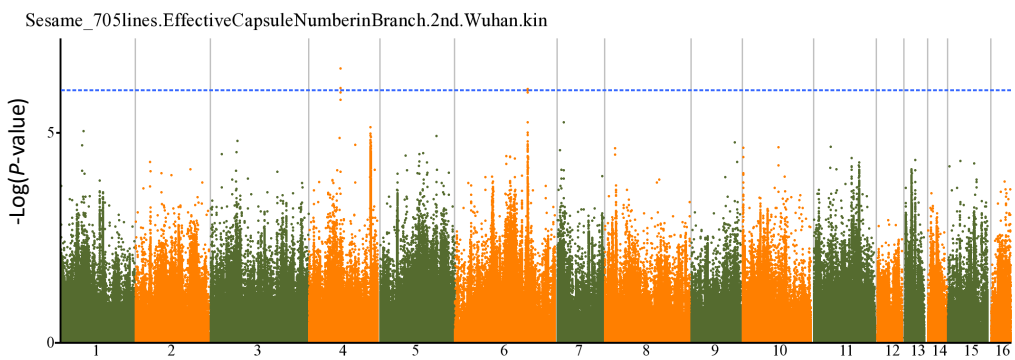

### CN-SY

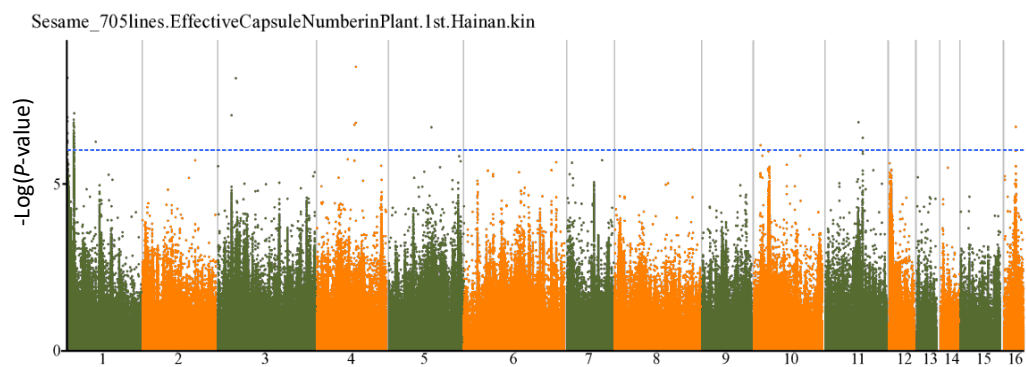

### CN-NN

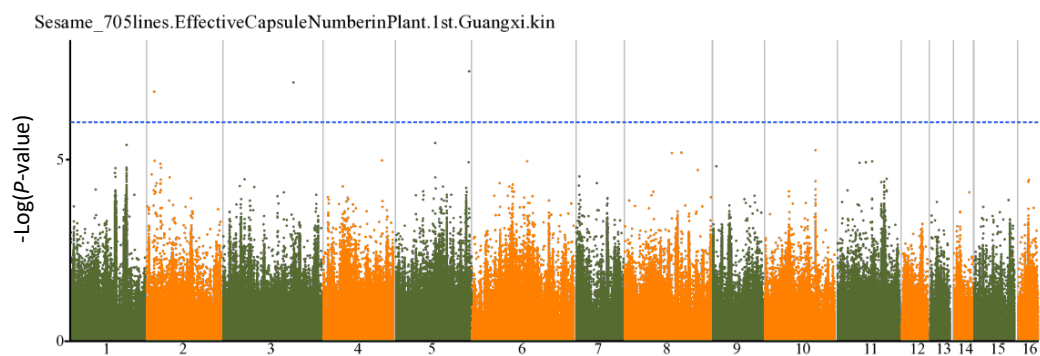

### CN-WH

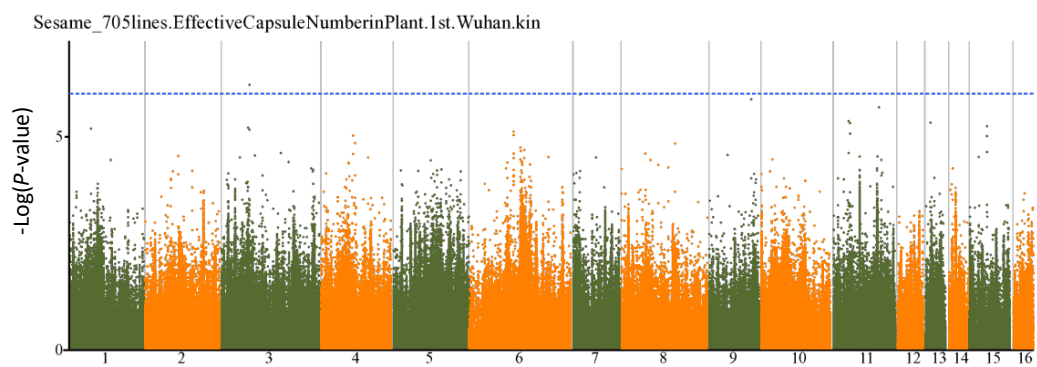

### LCNB-SY

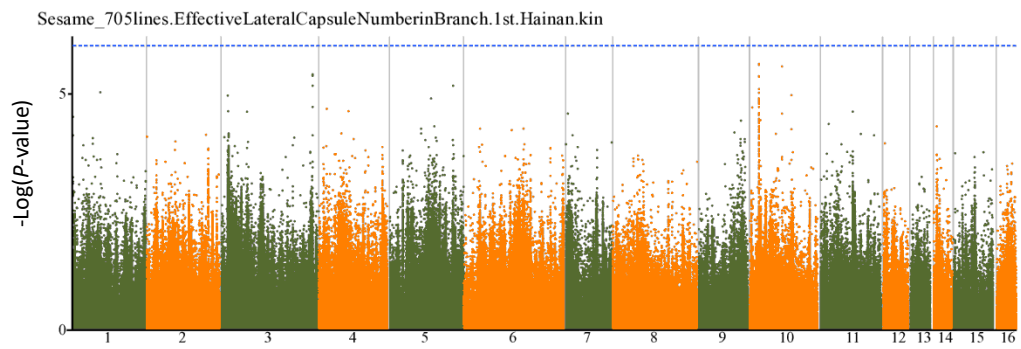

### LCNB-NN

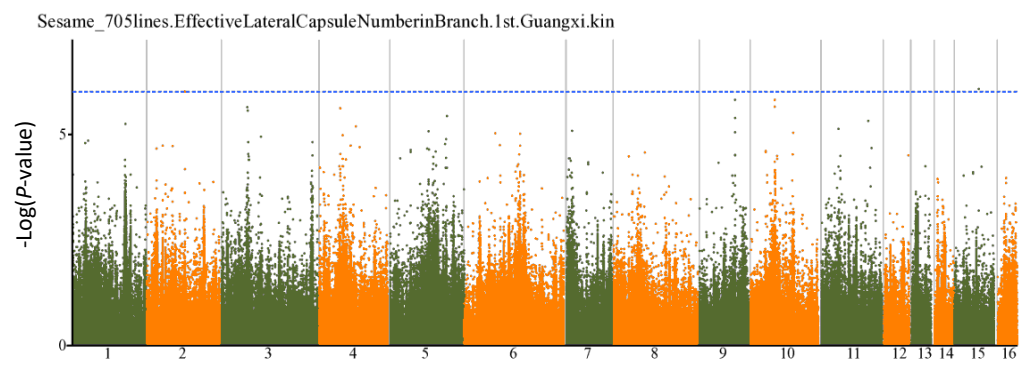

### LCNB-WH

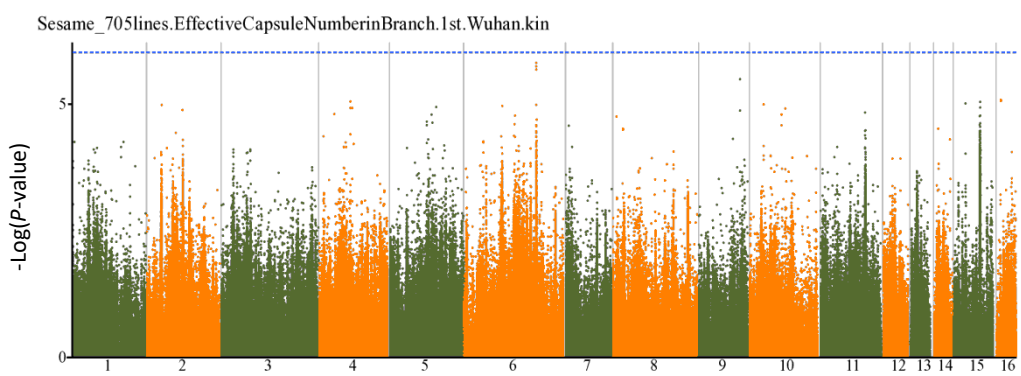

### MCNB-SY

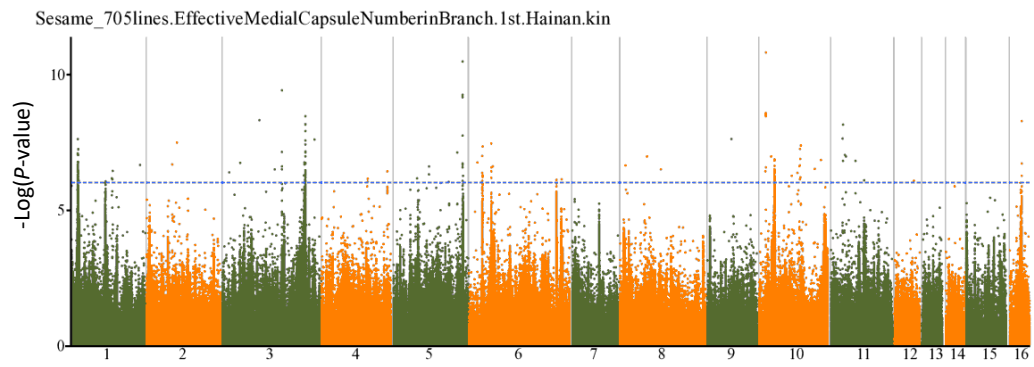

### MCNB-NN

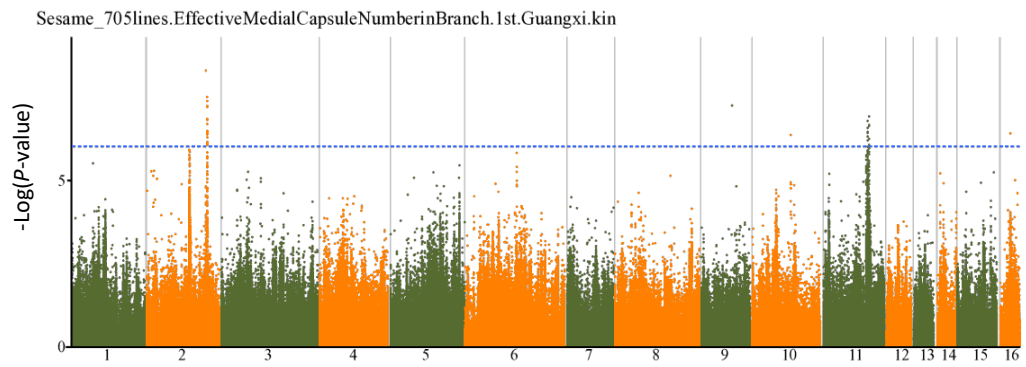

### MCNB-WH

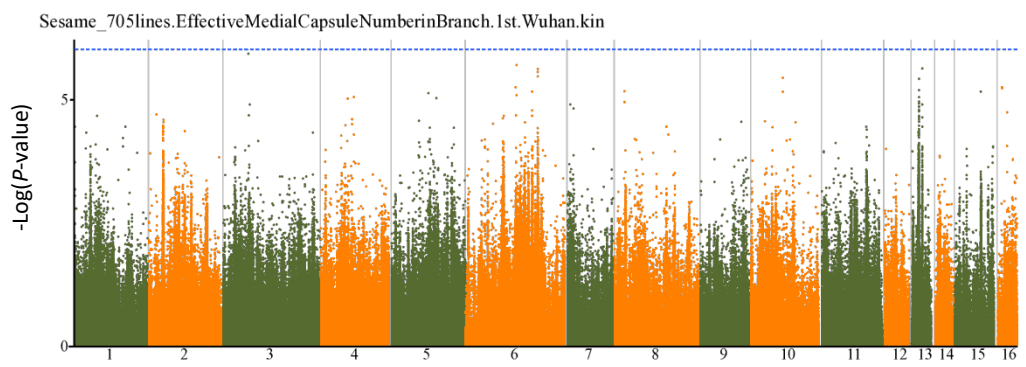

### MCNM-SY

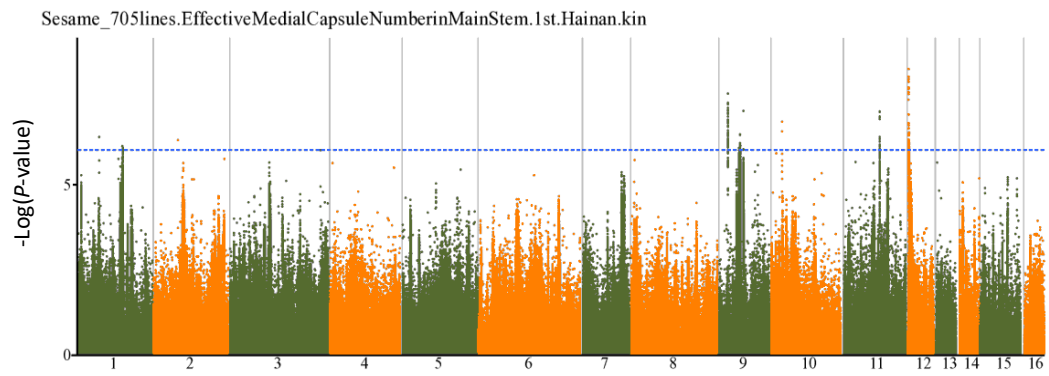

### MCNM-NN

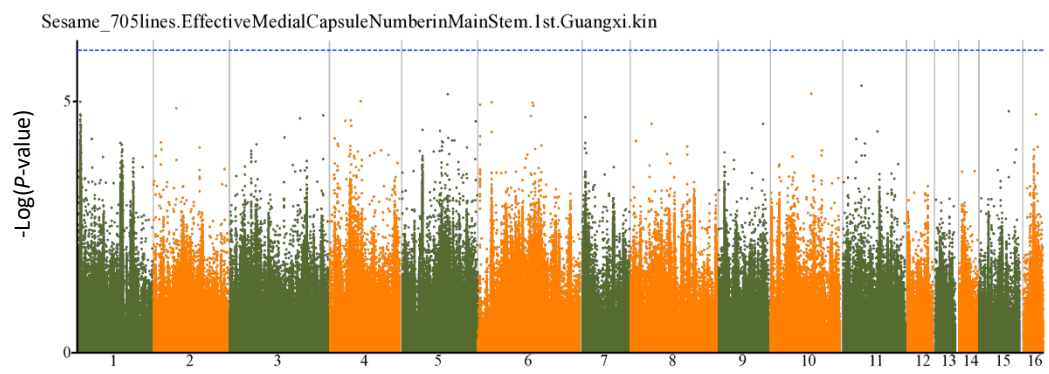

### MCNM-WH

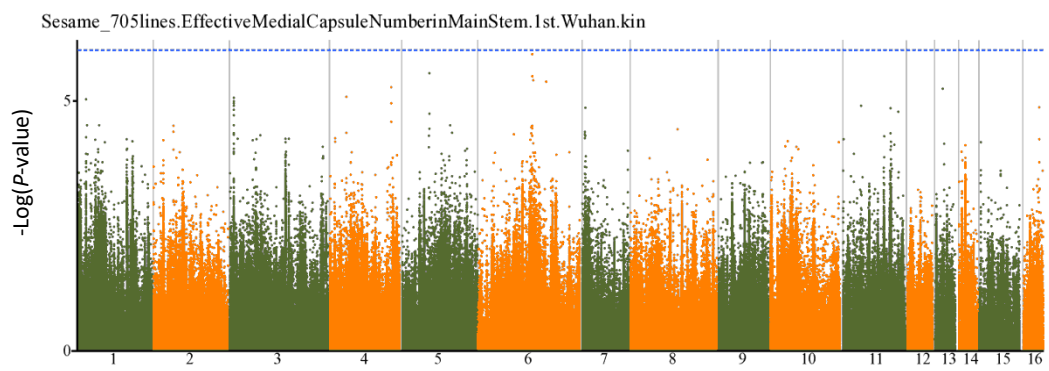

### LLB-SY

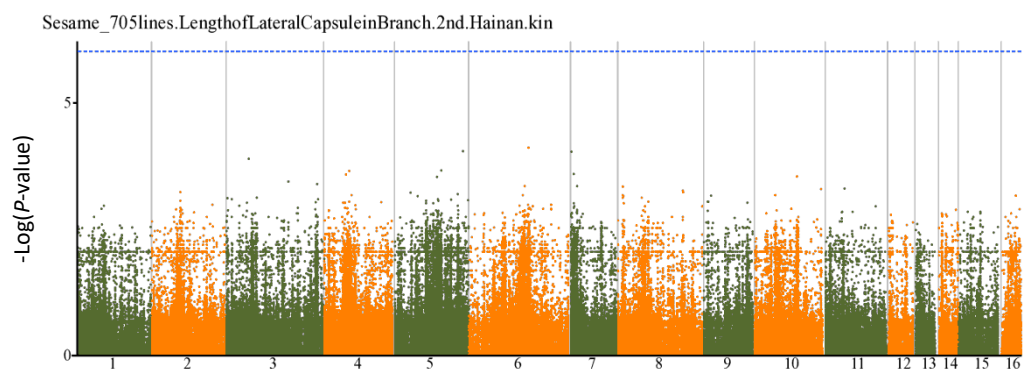

### LLB-NN

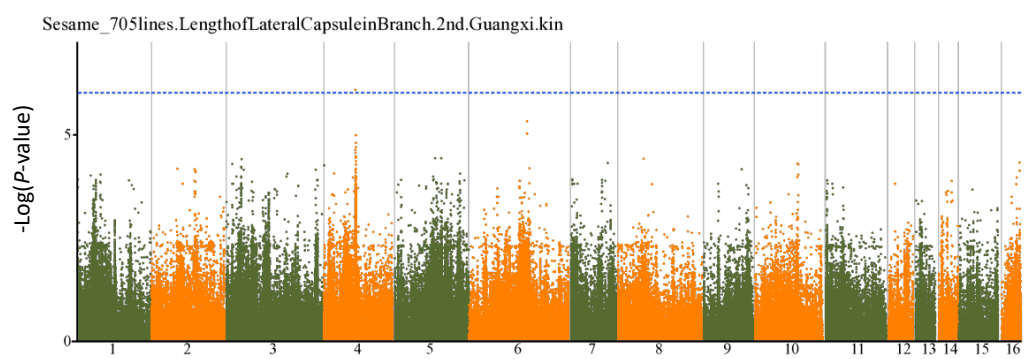

### LLB-WH

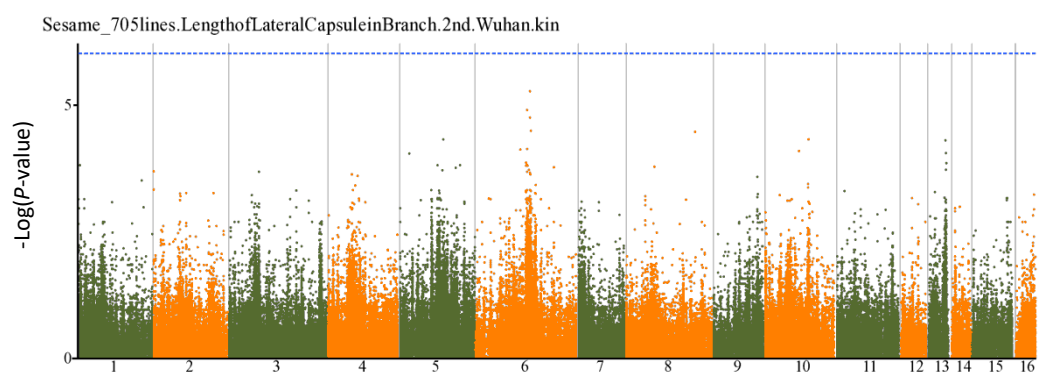

### LLM-SY

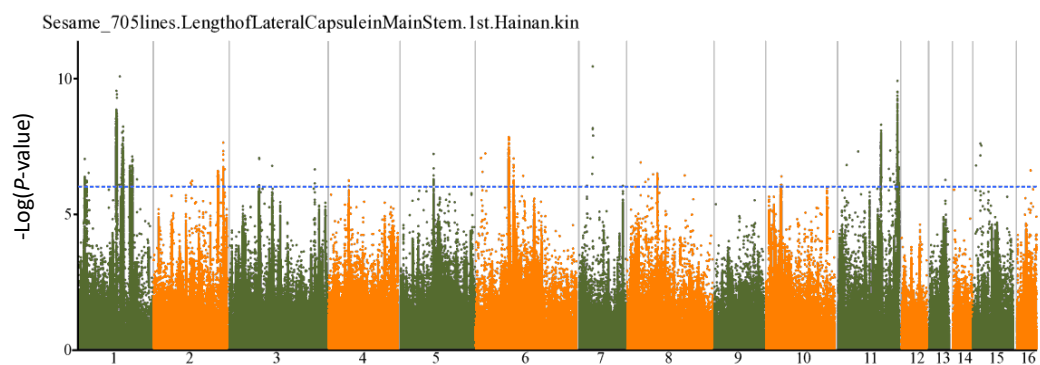

### LLM-NN

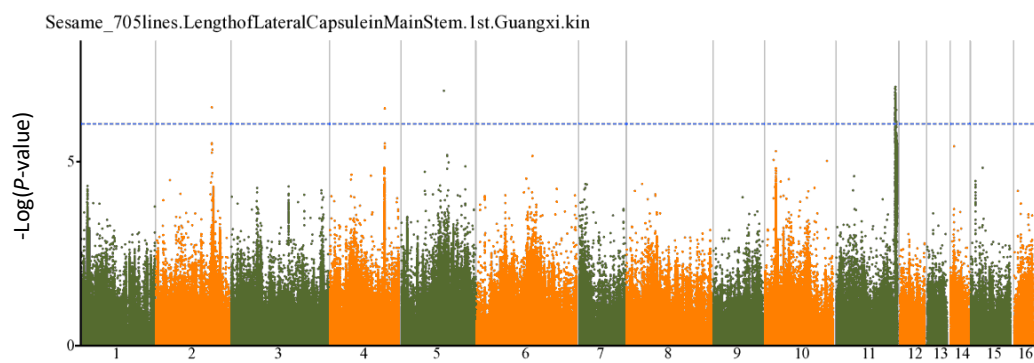

### LLM-WH

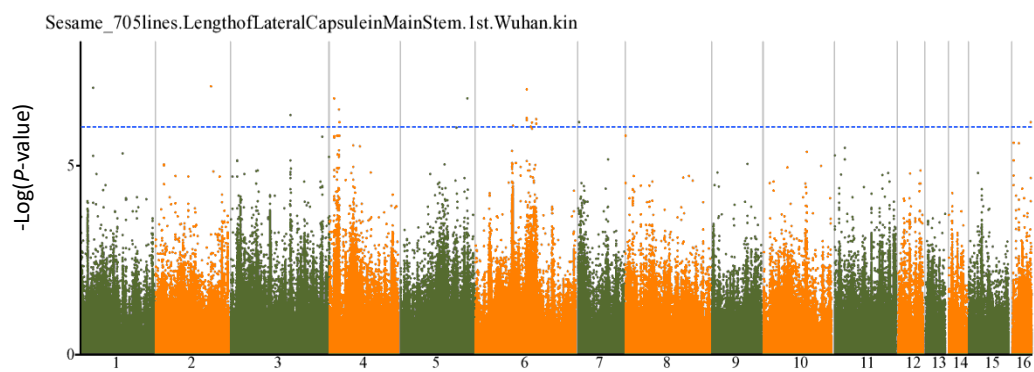



### LMB-SY

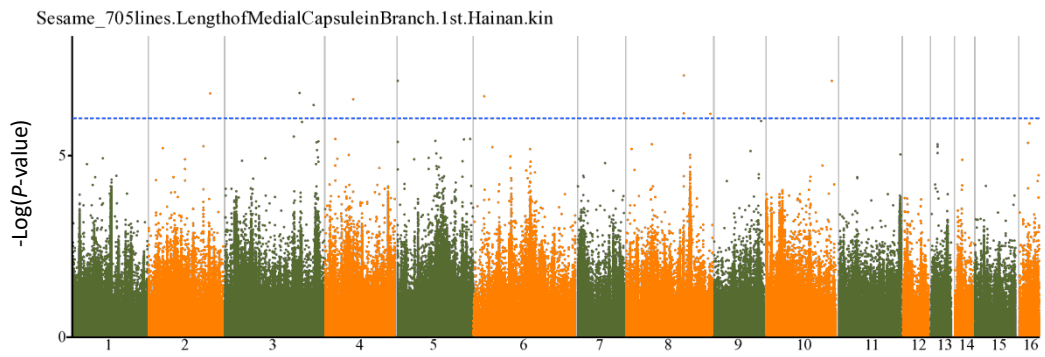

### LMB-NN

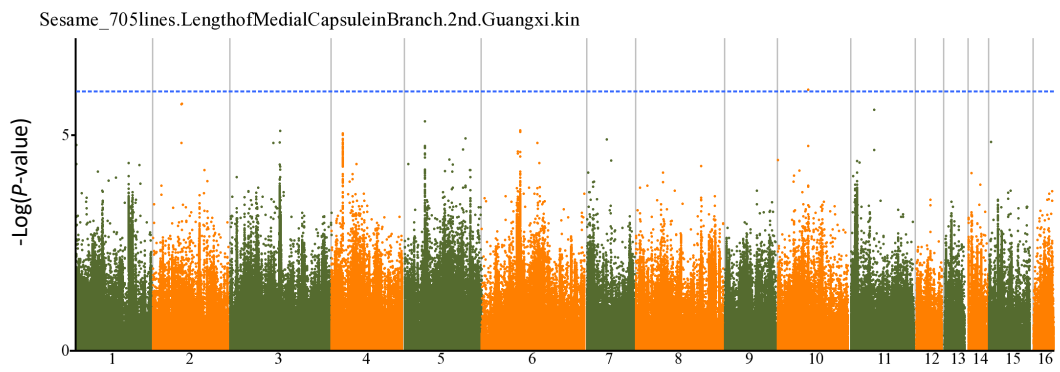

### LMB-WH

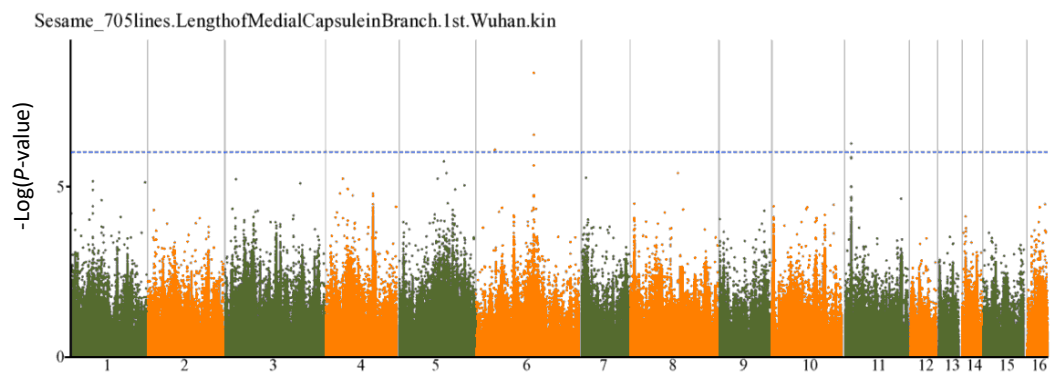



### RLM-SY

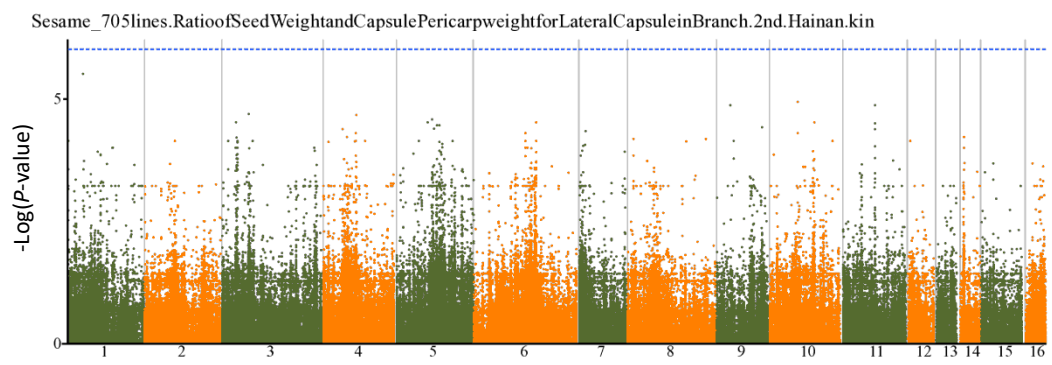

### RLM-NN

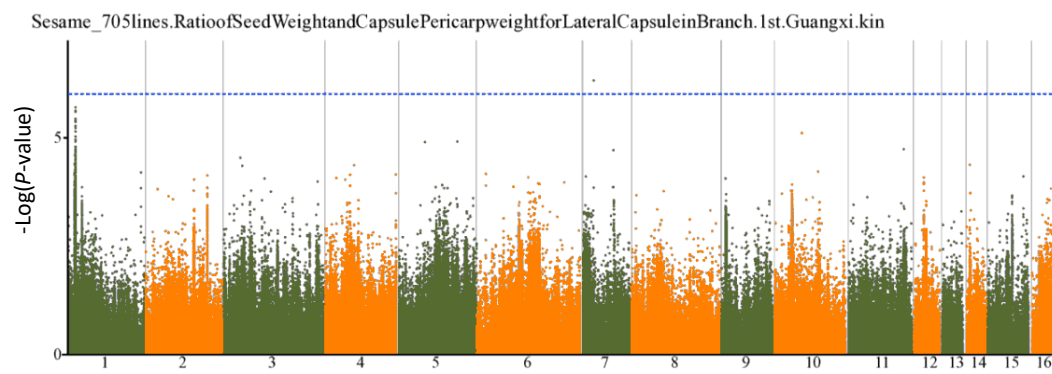

### RLM-WH

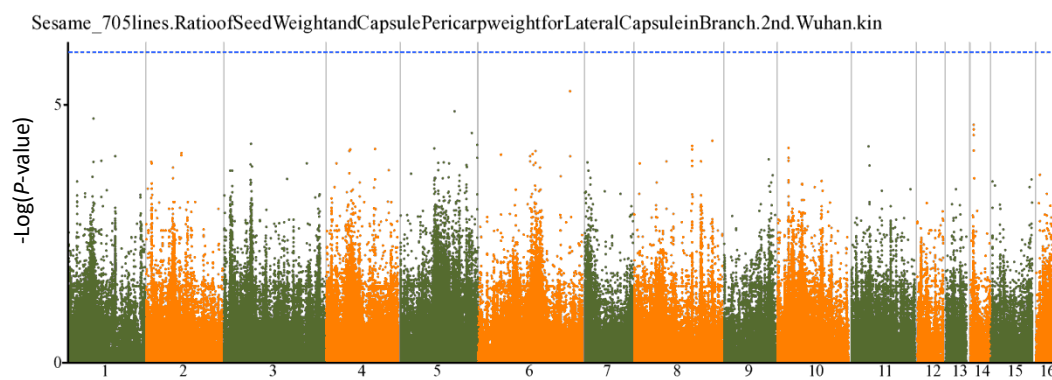

### RMB-SY

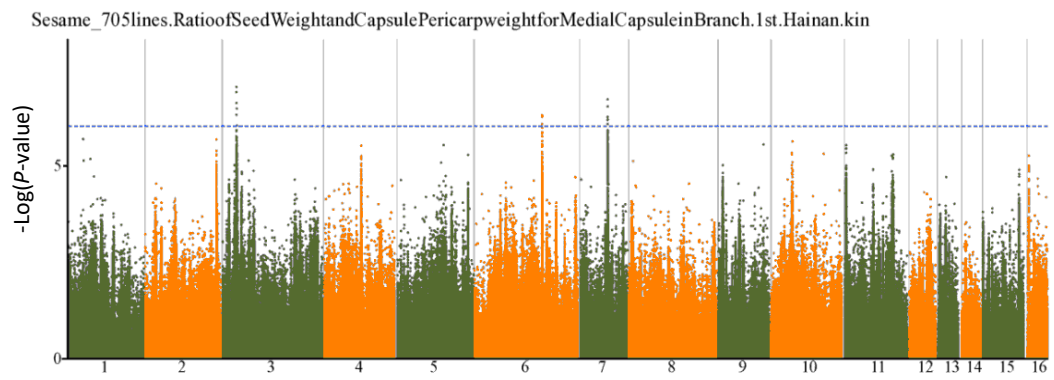

### RMB-NN

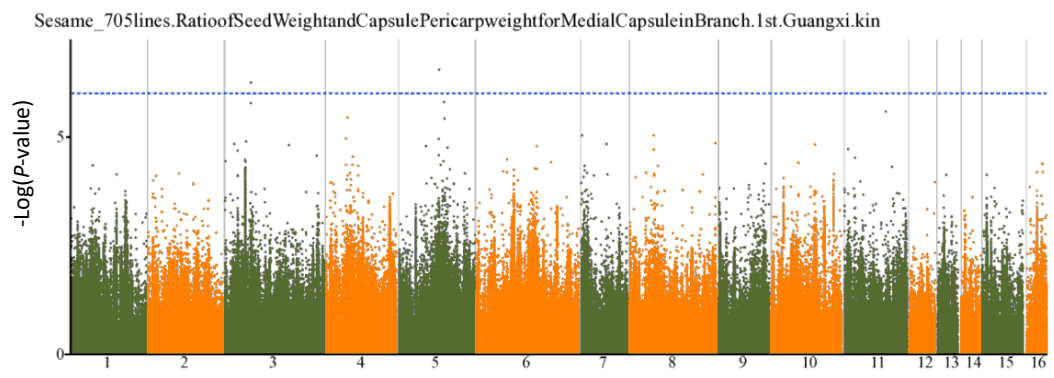

### RMB-WH

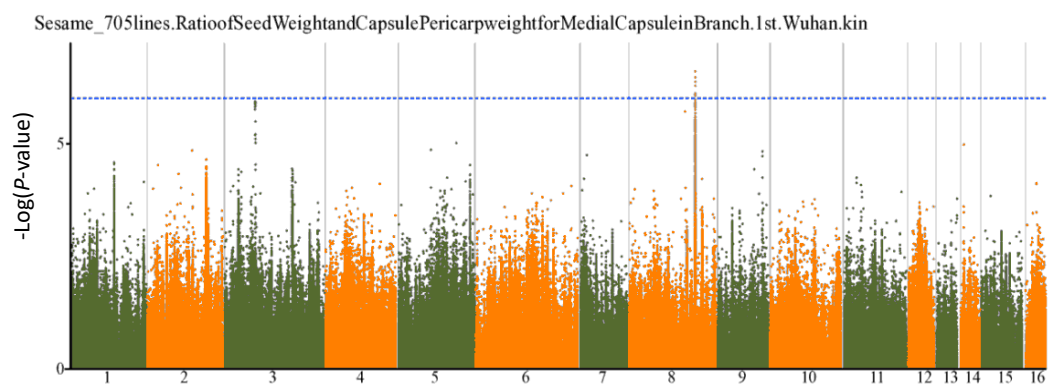

### RMM-SY

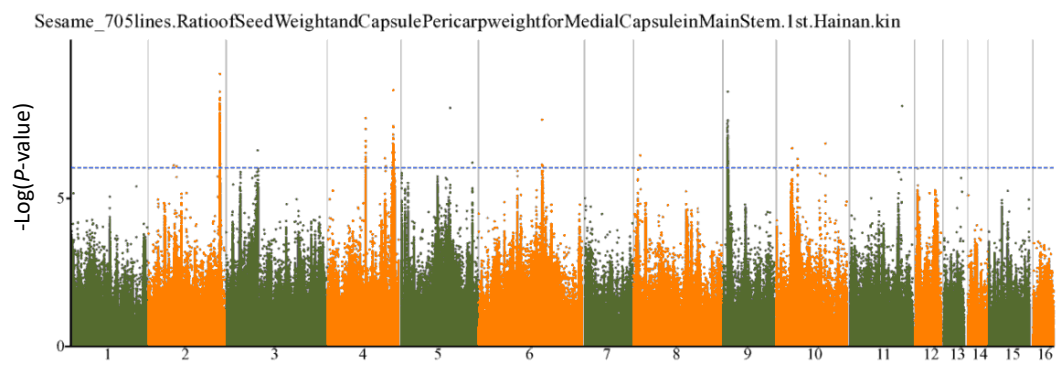

### RMM-NN

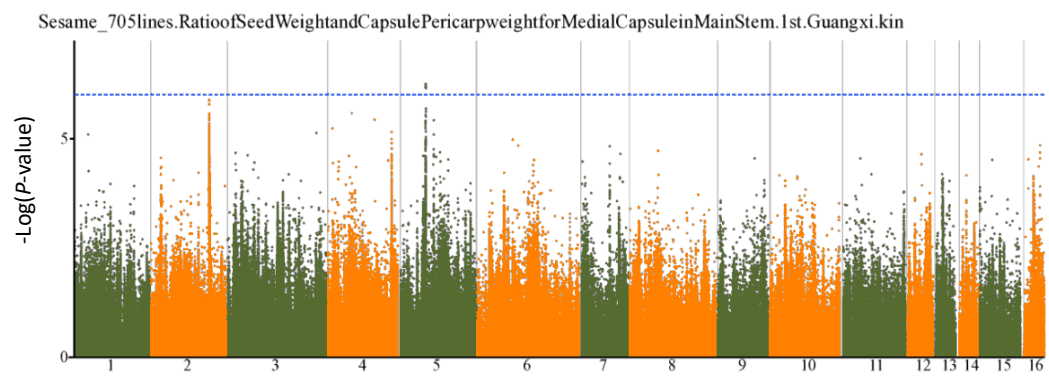

### RMM-WH

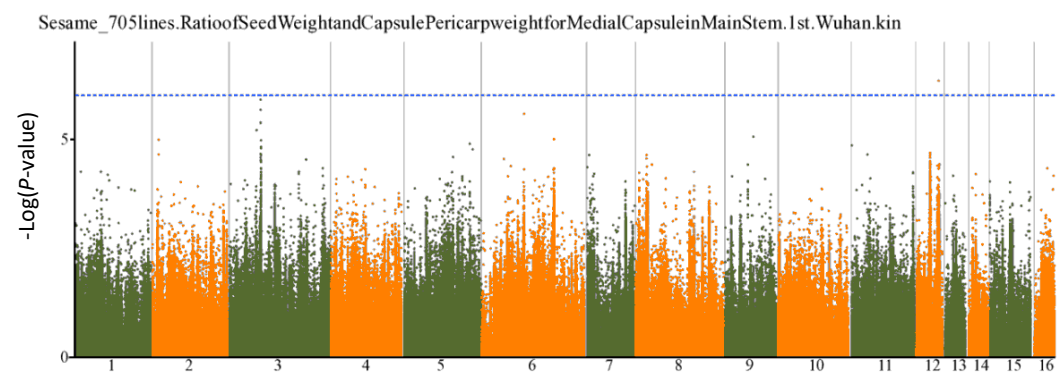

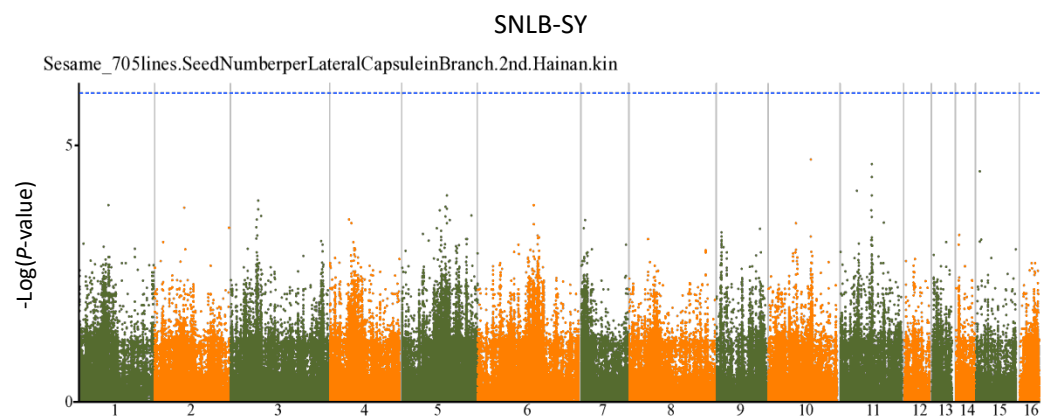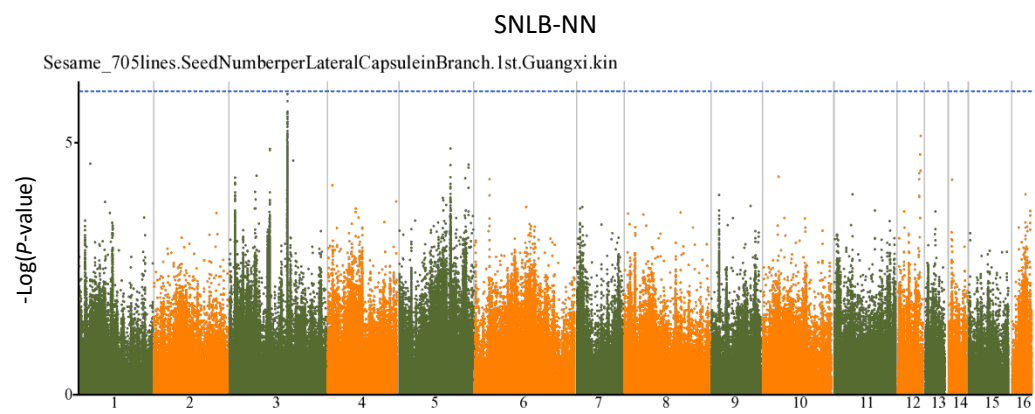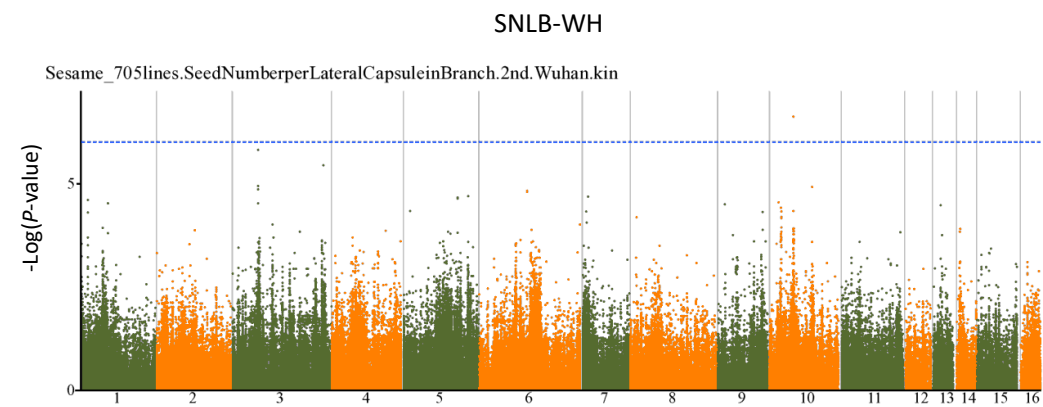

### SNLM-SY

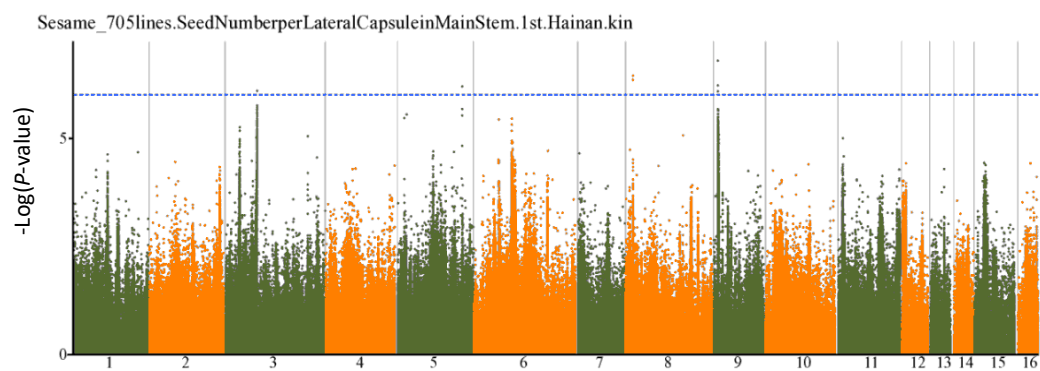

### SNLM-NN

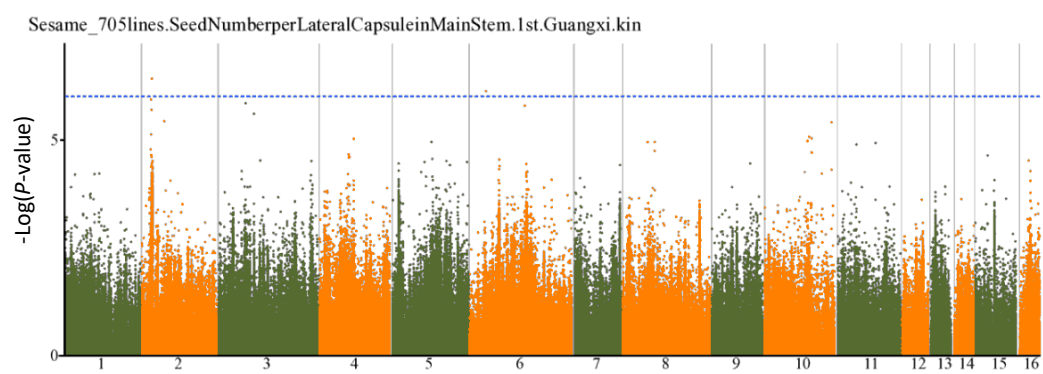

### SNLM-WH

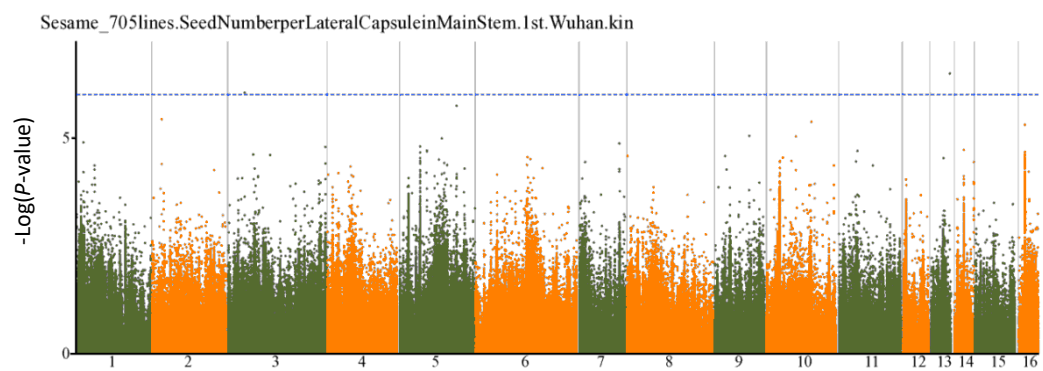

### SNMB-SY

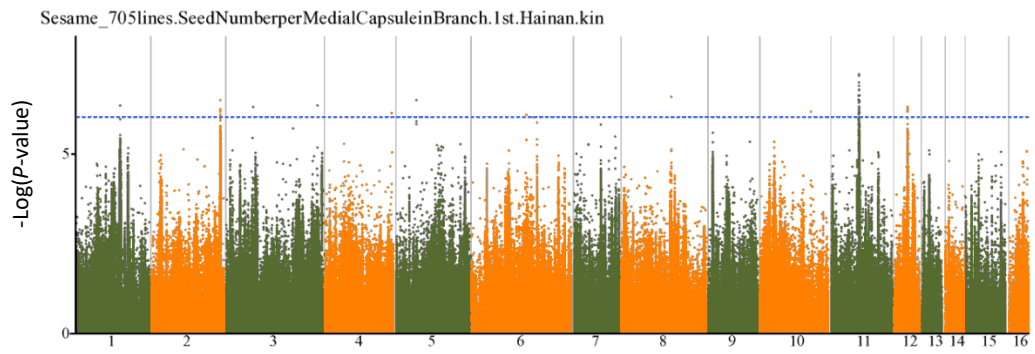

### SNMB-NN

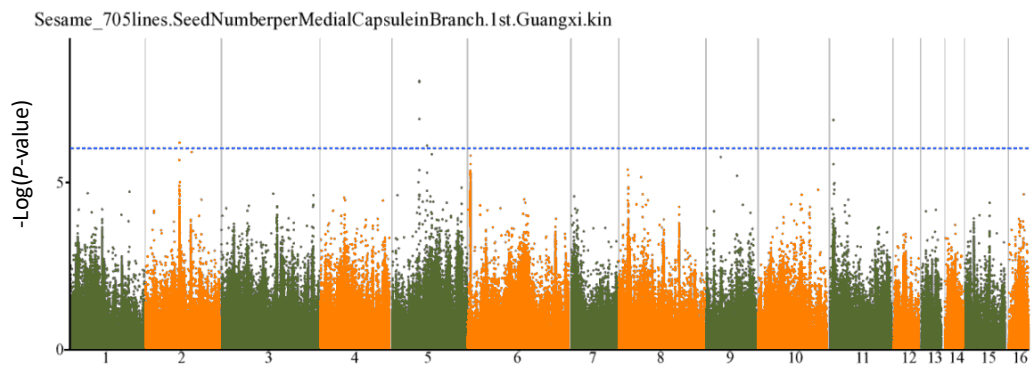

### SNMB-WH

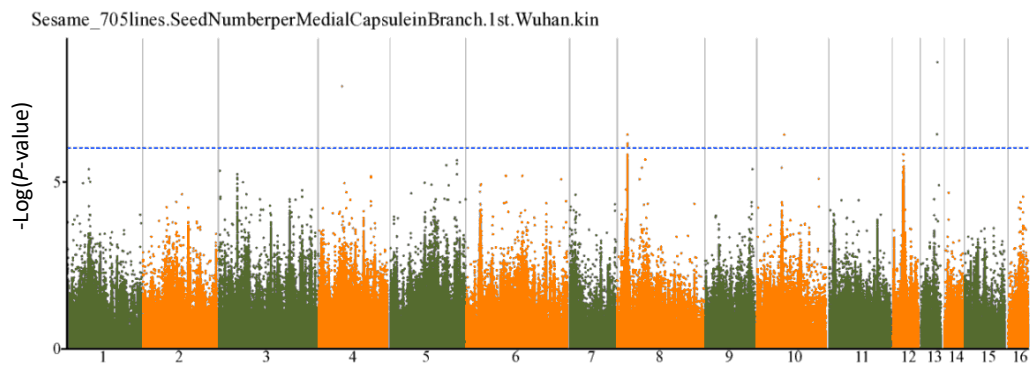

### SNMM-SY

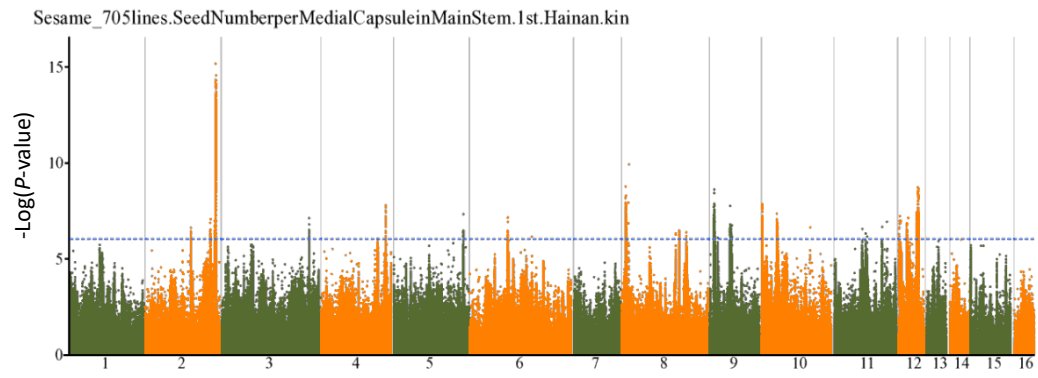

### SNMM-NN

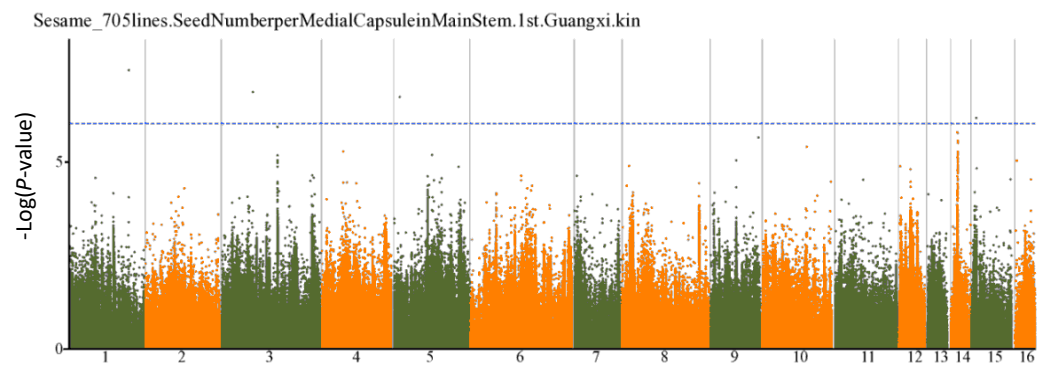

### SNMM-WH

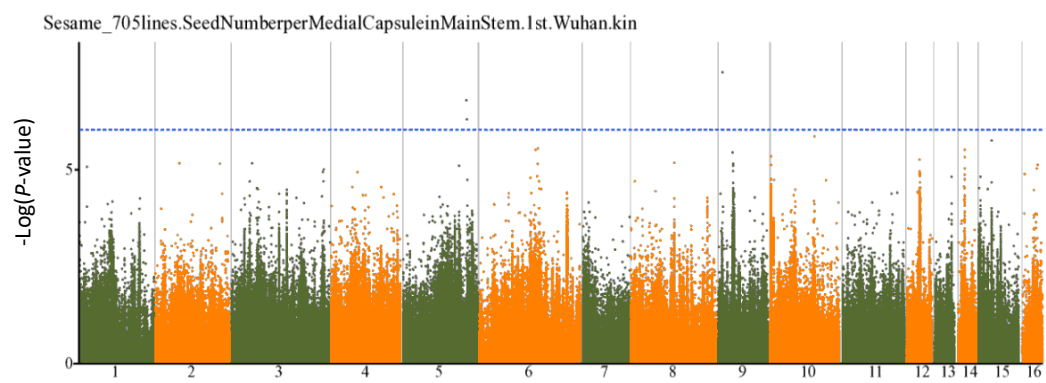



### TLM-SY

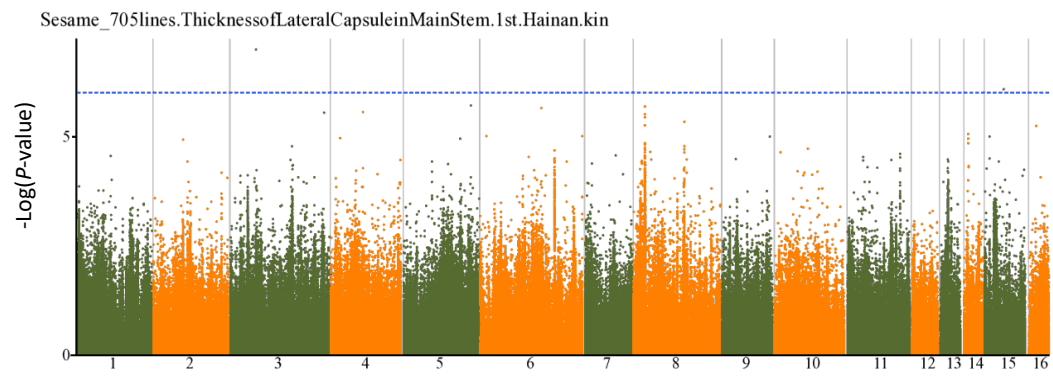

### TLM-NN

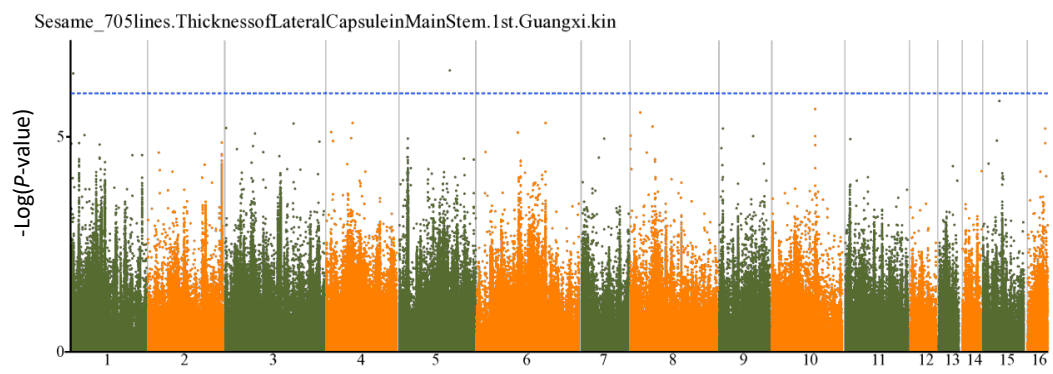

### TLM-WH

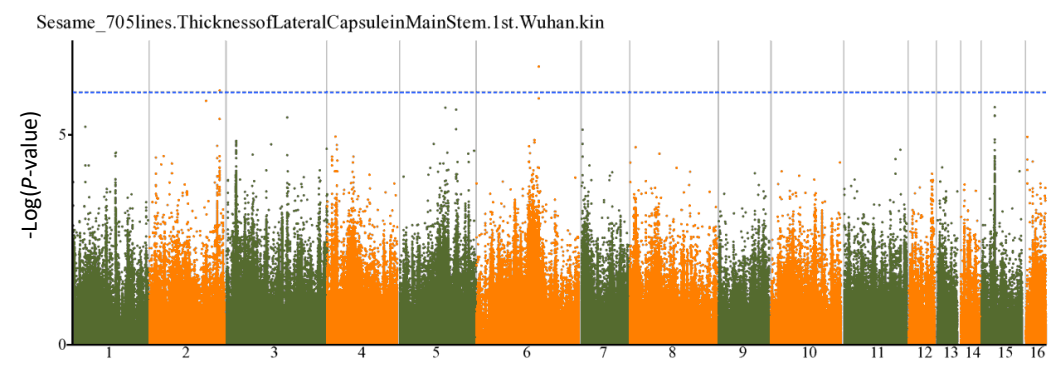



### TMB-SY

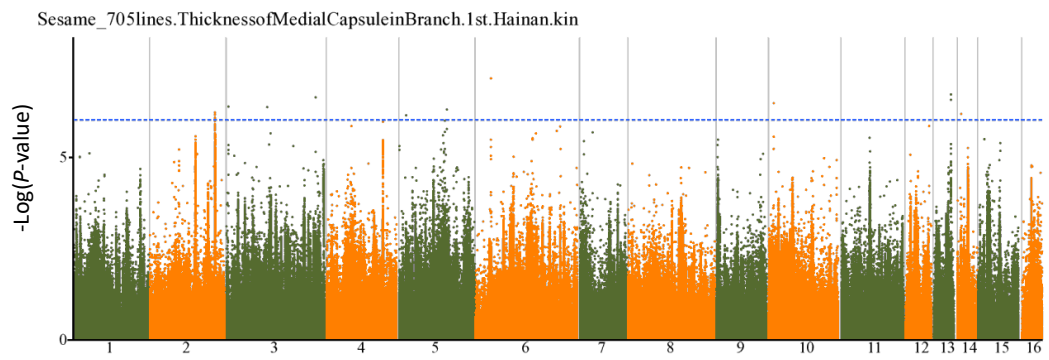

### TMB-NN

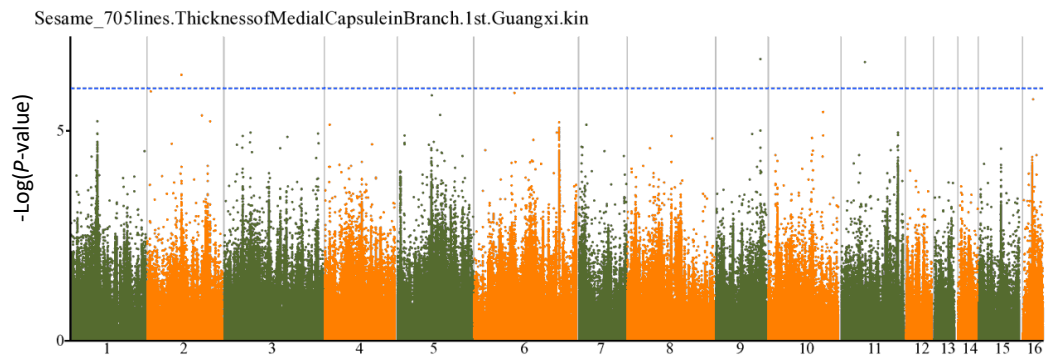

### TMB-WH

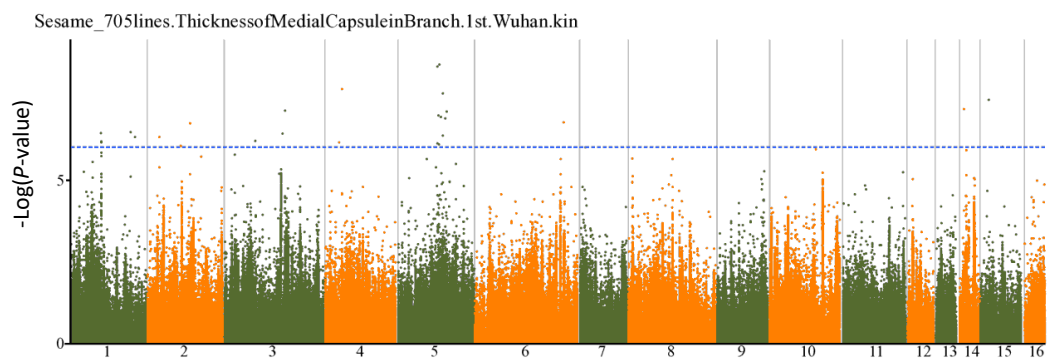

### TMM-SY

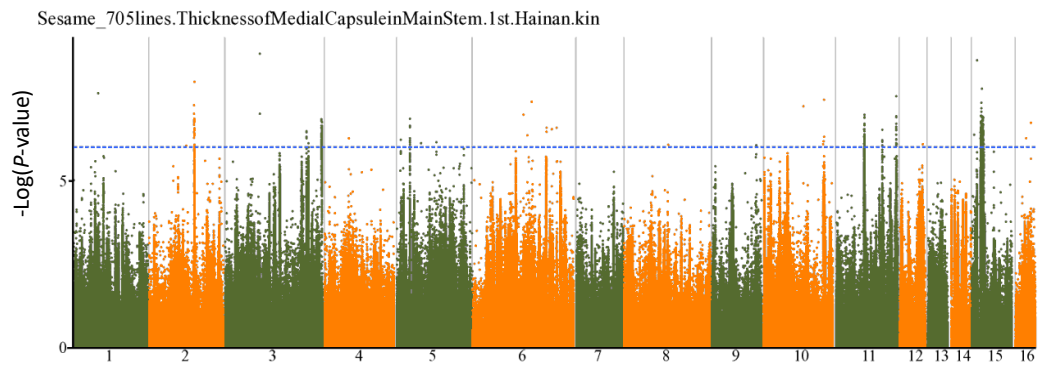

### TMM-NN

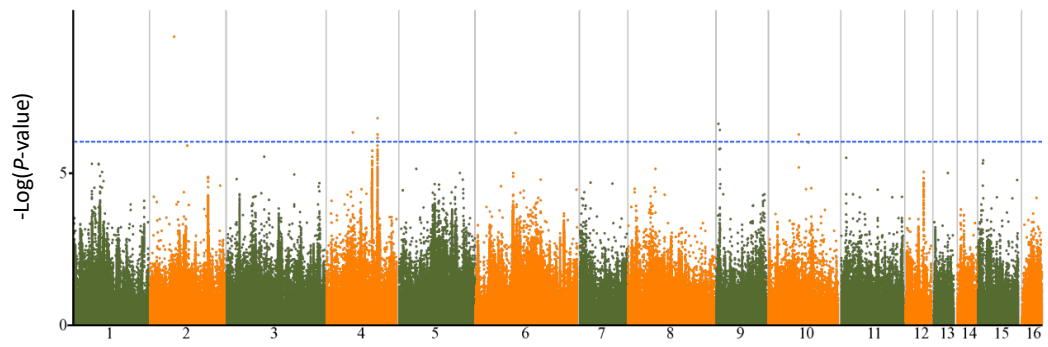

### TMM-WH

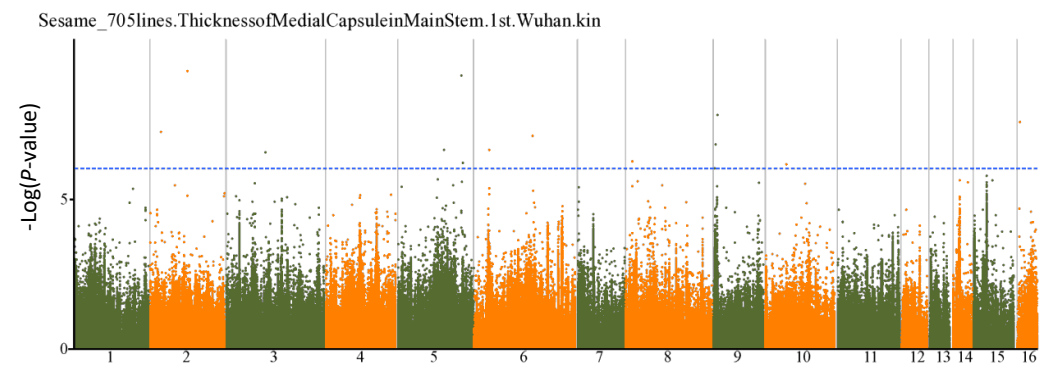

### TSW-NN

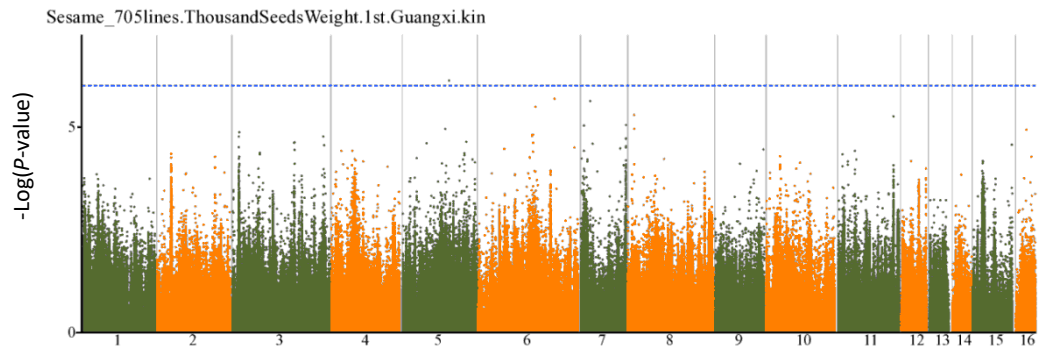

### TSW-WH

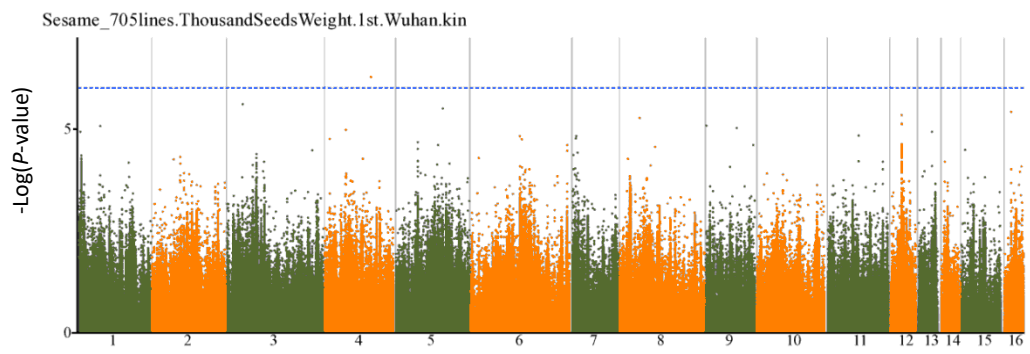

### WLM-SY

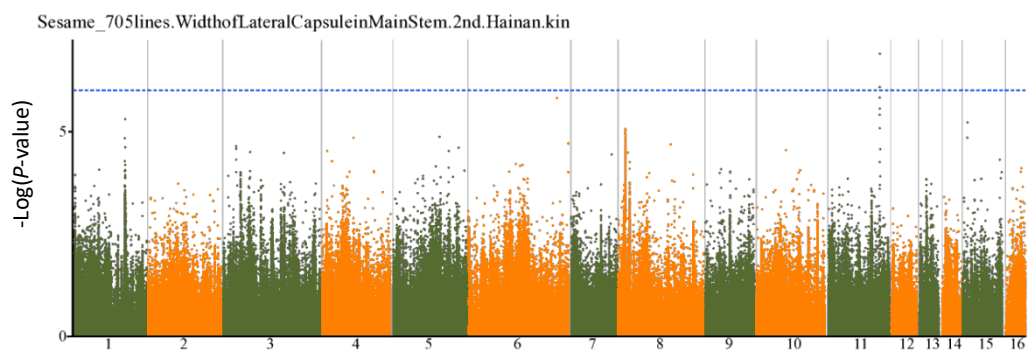

### WLM-NN

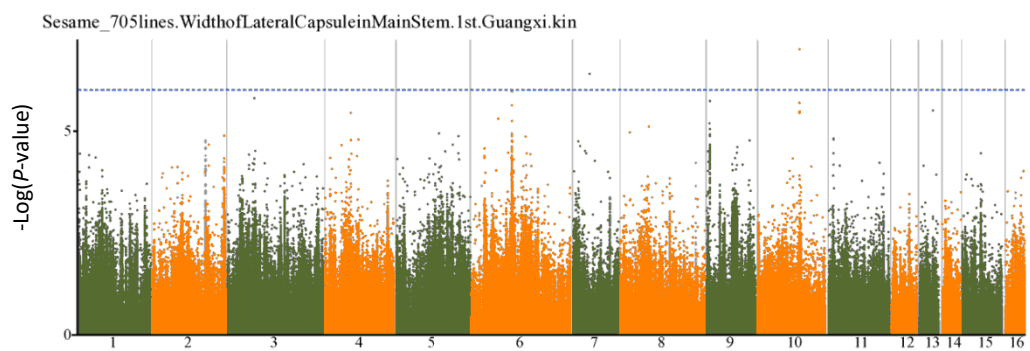

### WLM-WH

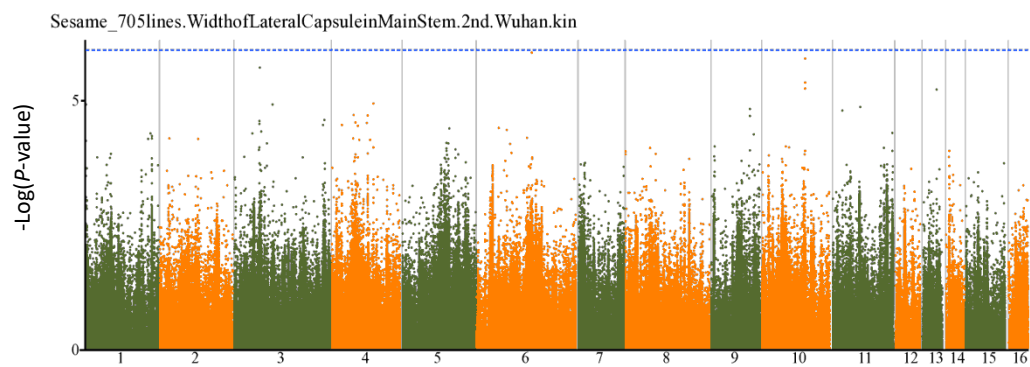

### WMB-SY

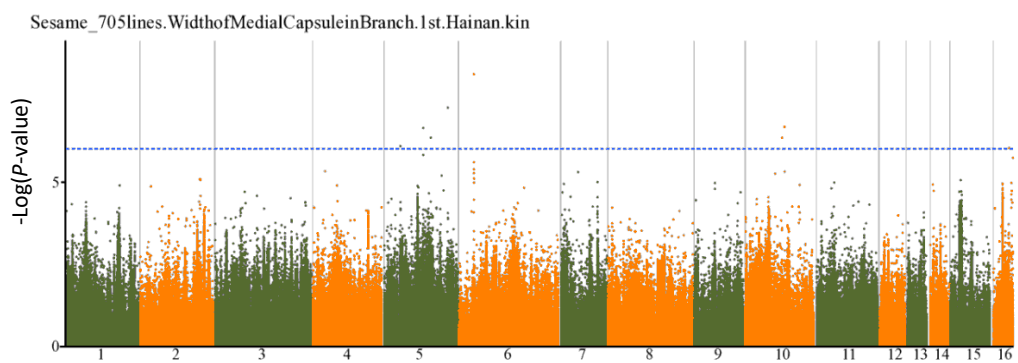

### WMB-NN

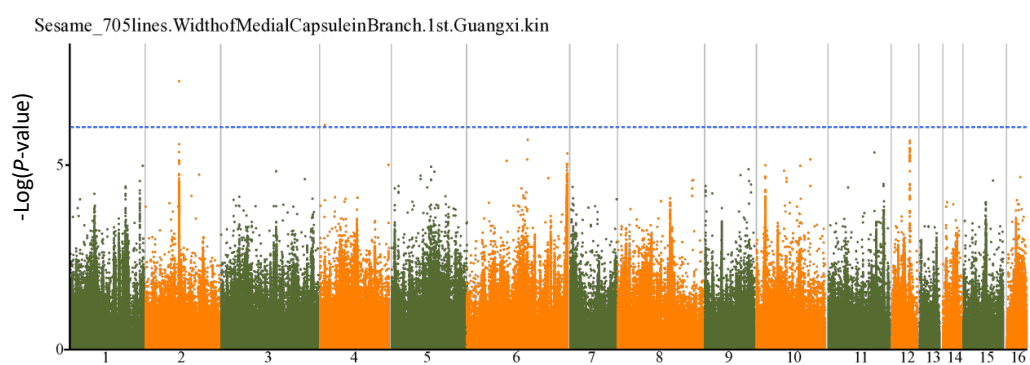

### WMB-WH

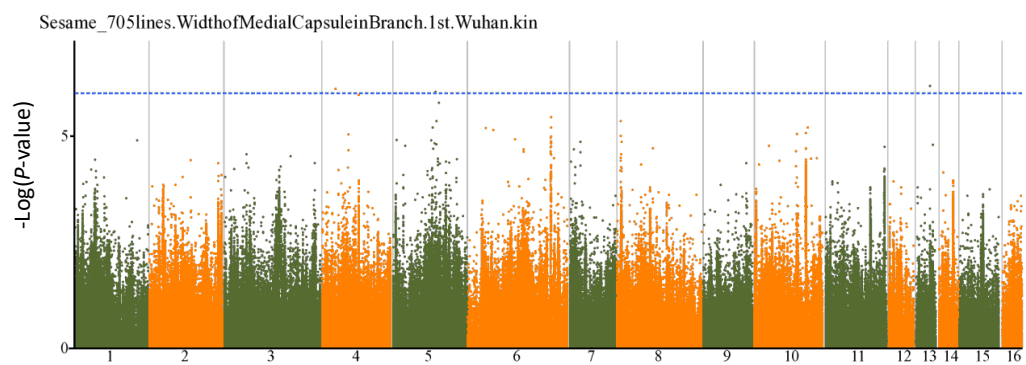

### WMM-SY

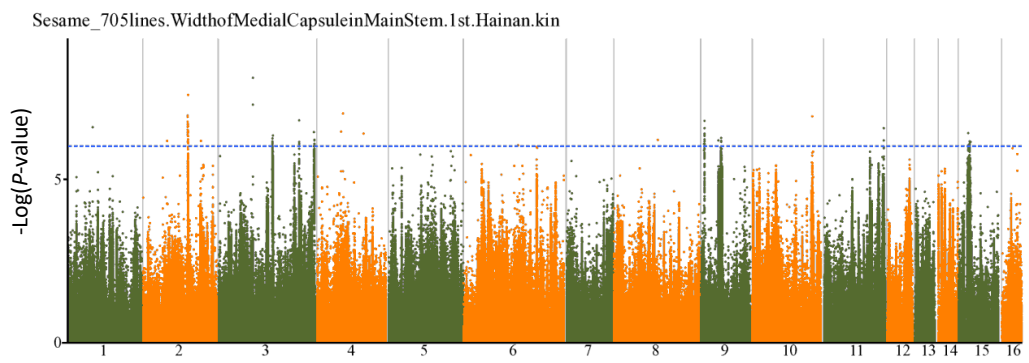

### WMM-NN

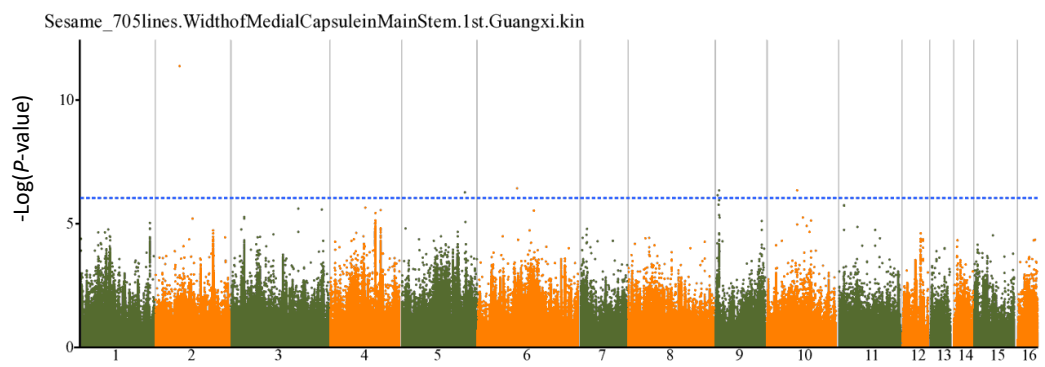

### WMM-WH

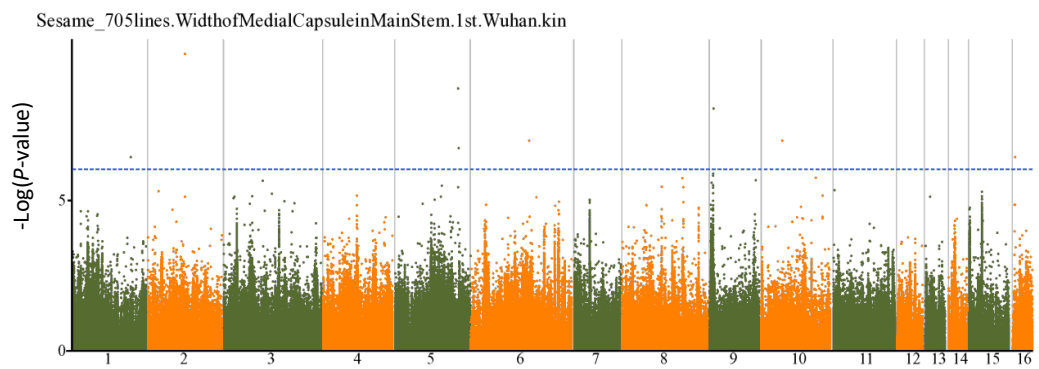

### YB-SY

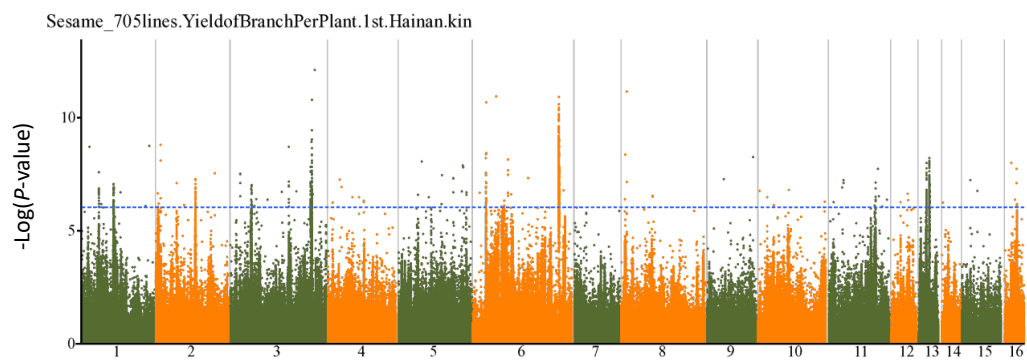

### YB-NN

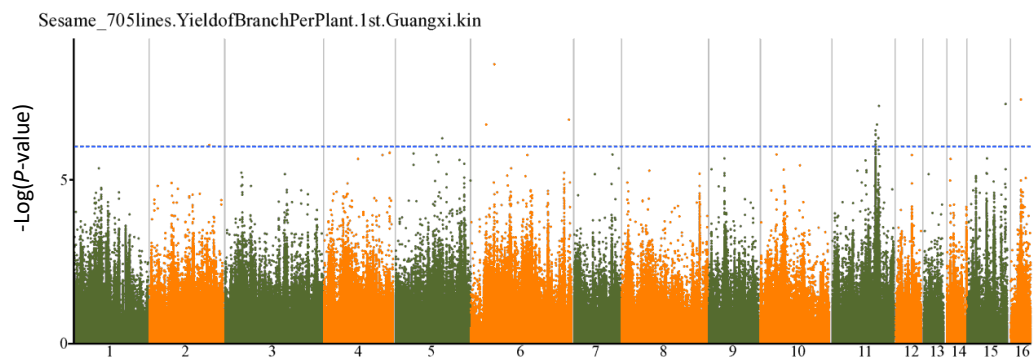

### YB-WH

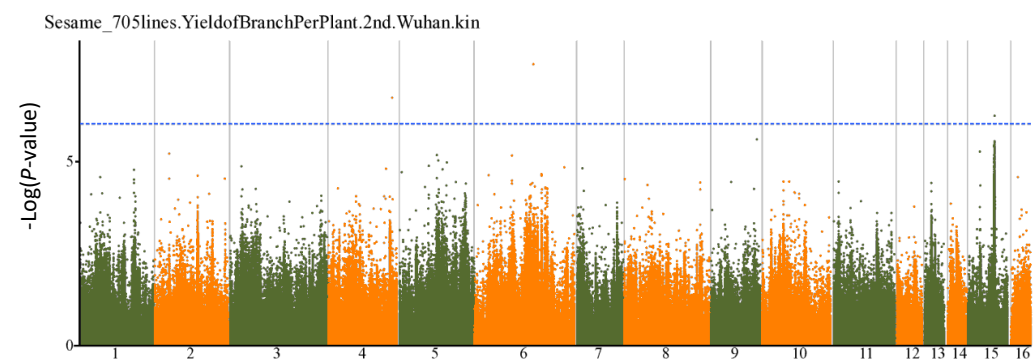

### YLB-SY

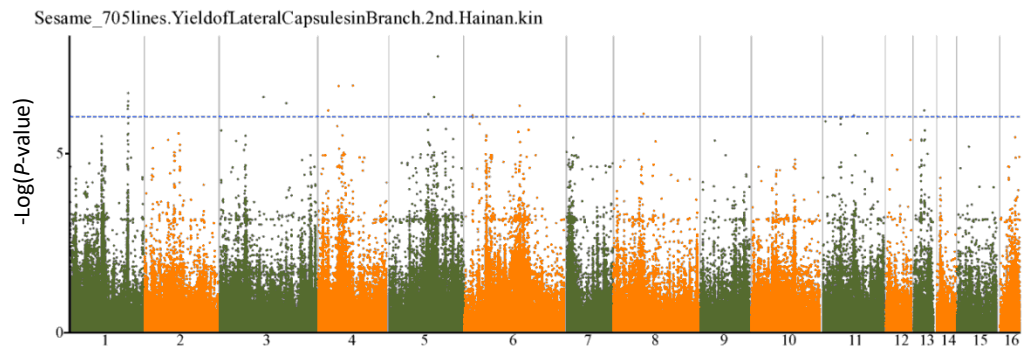

### YLB-NN

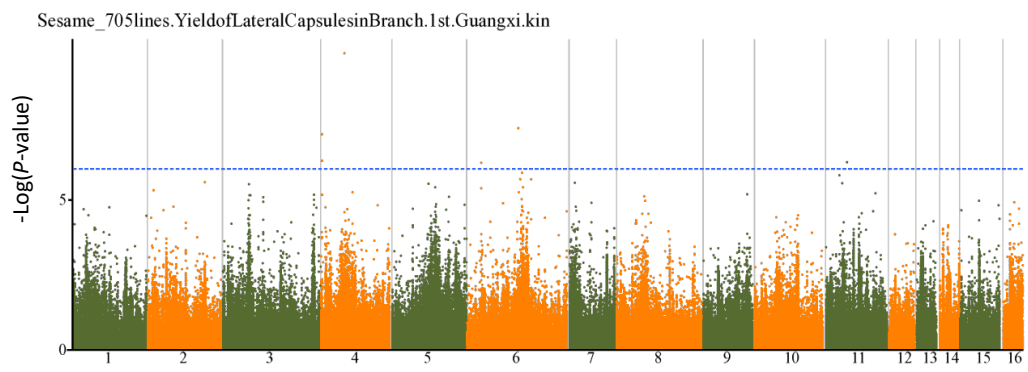



### YLM-SY

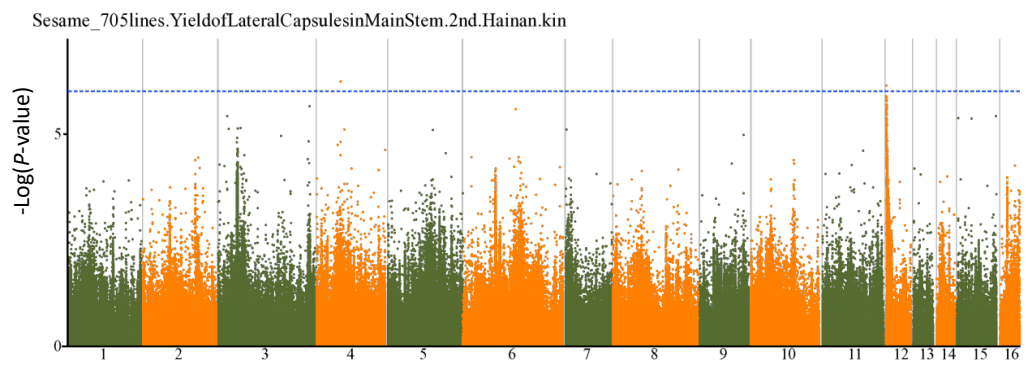

### YLM-NN

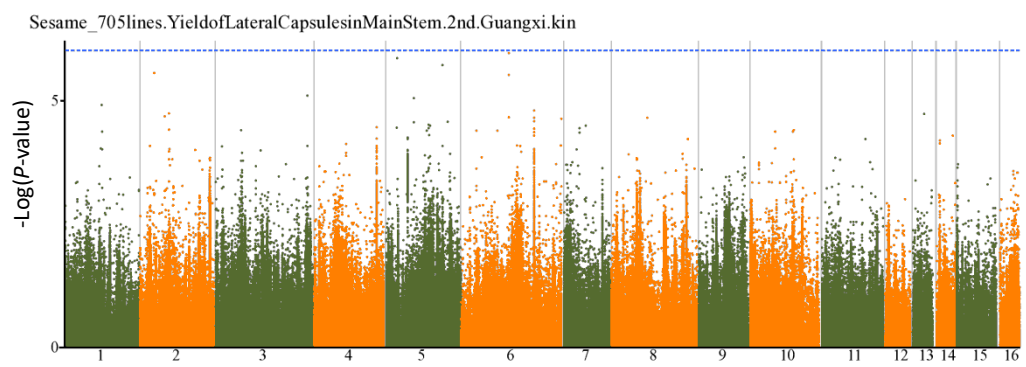

### YM-SY

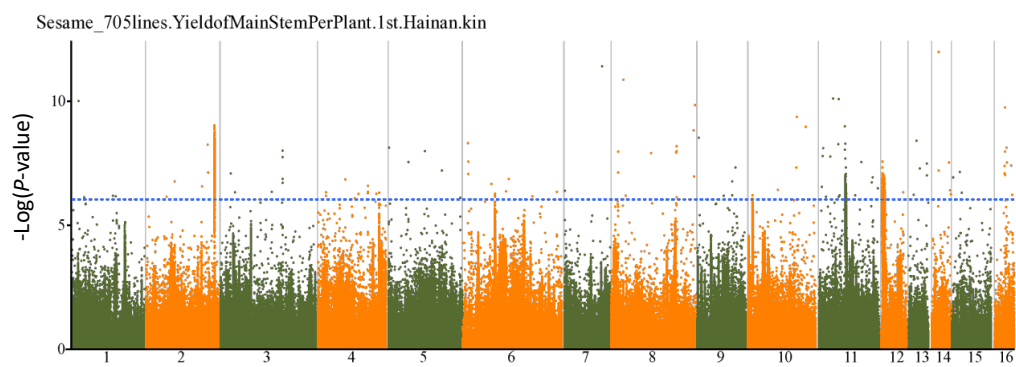

### YM-NN

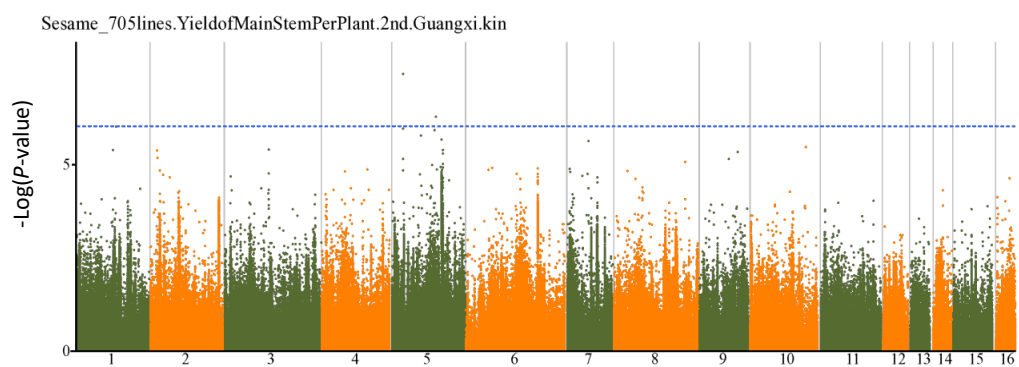

### YM-WH

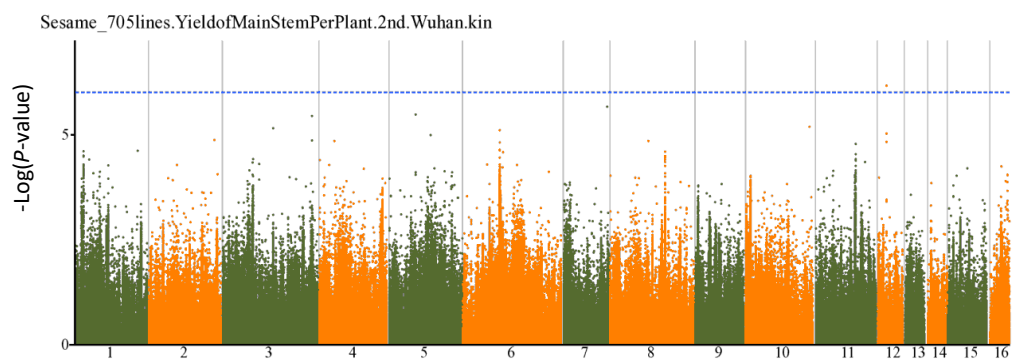

### YMB-SY

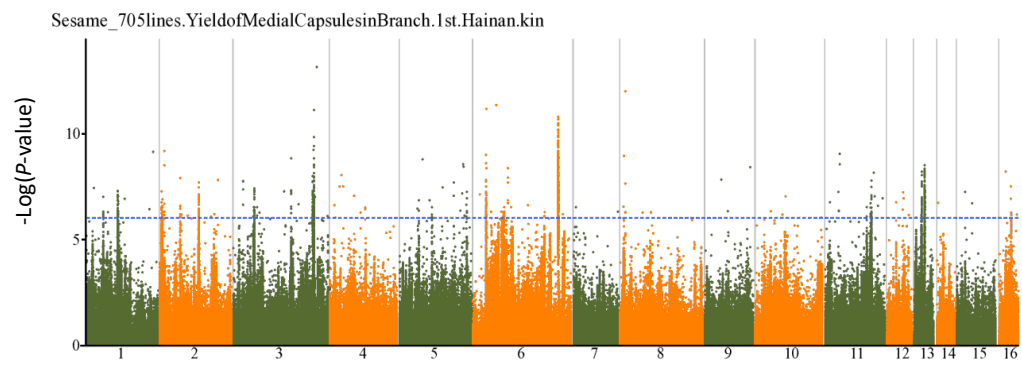

### YMB-NN

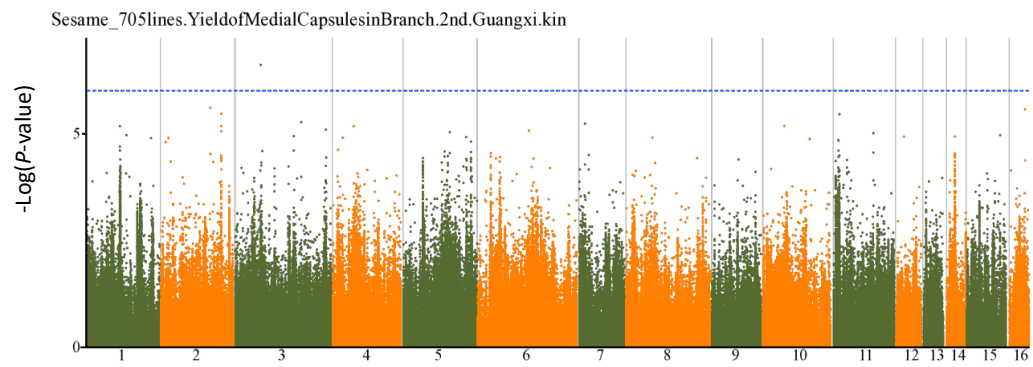

## YMM-SY

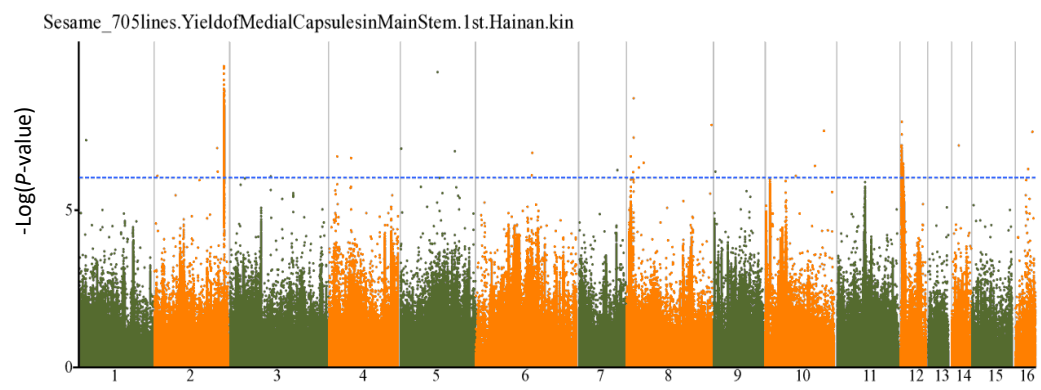

## YMM-NN

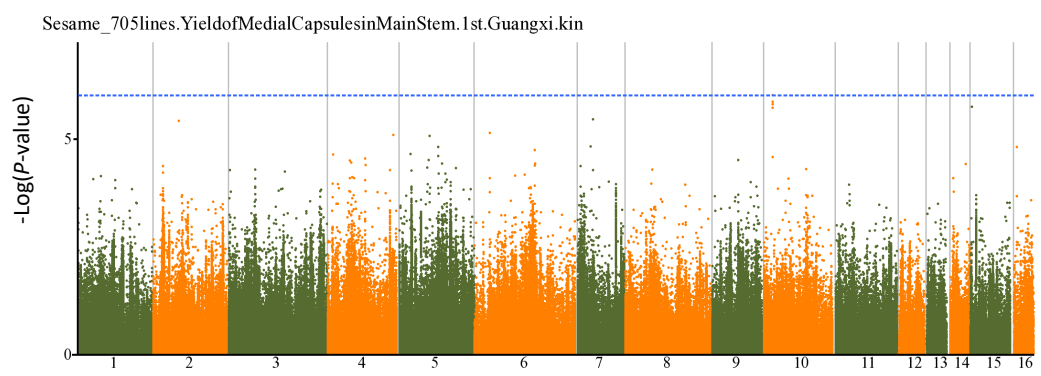

### YP-SY

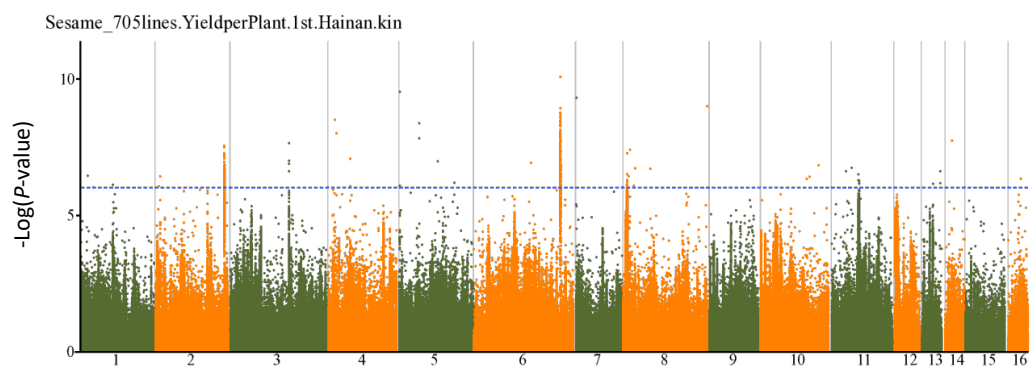

### YP-NN

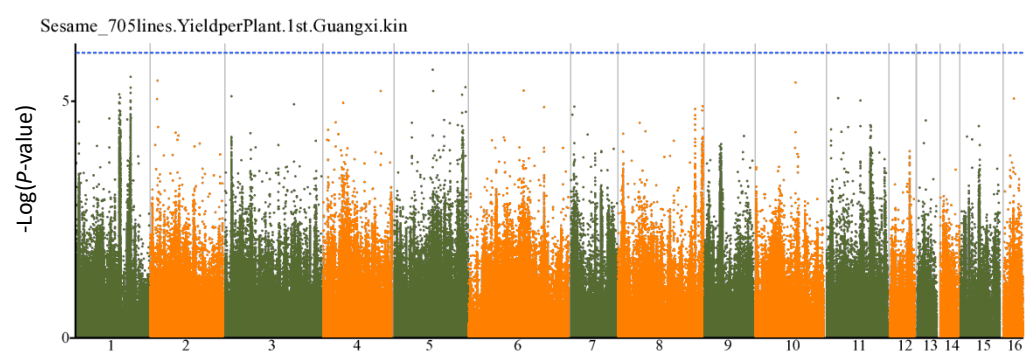

### YP-WH

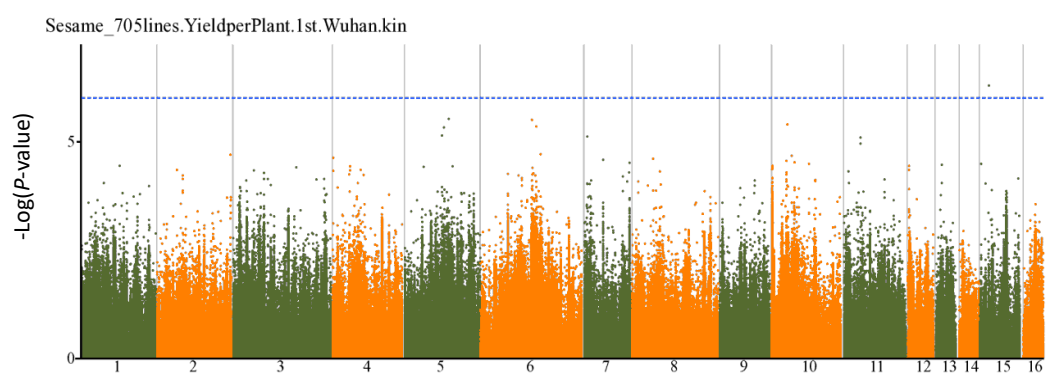

Supplement: s1 [file s1]
