# Supplementary figures and images for: Genome-Wide Association Studies of 39 Seed Yield-Related Traits in Sesame (Sesamum indicum L.)
Source: MDPI journal article supplement (doi:10.3390/ijms19092794), 2018-09-17

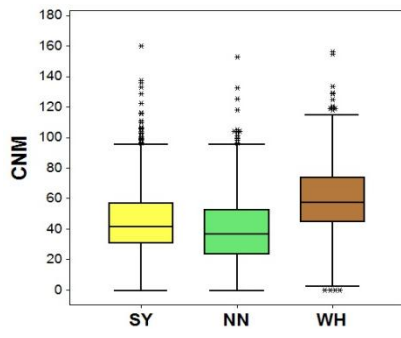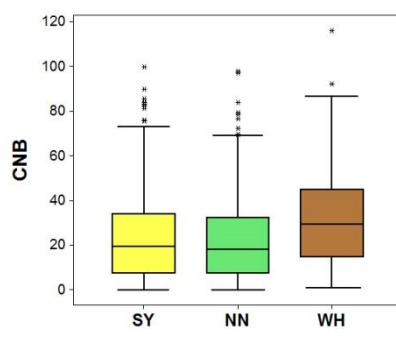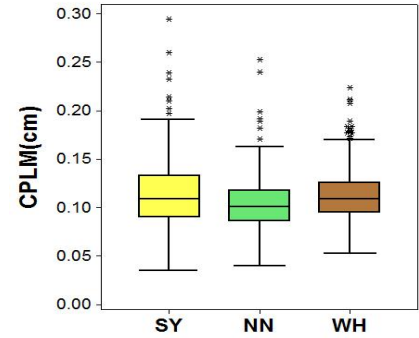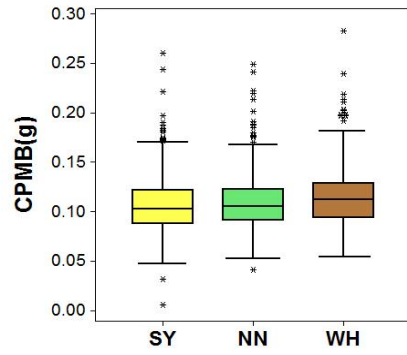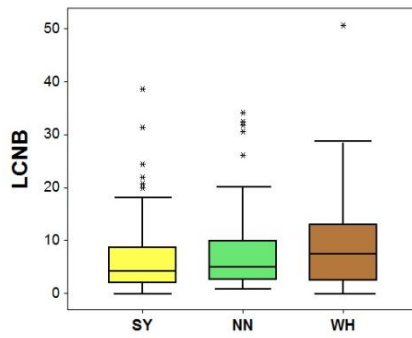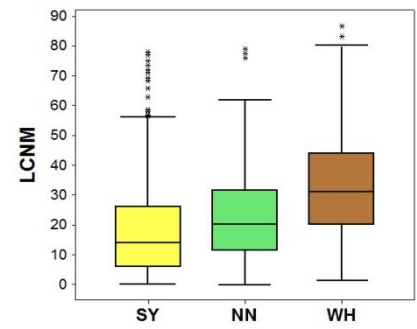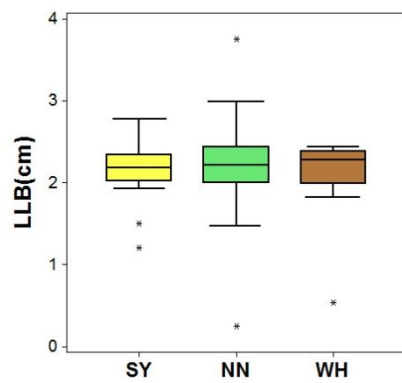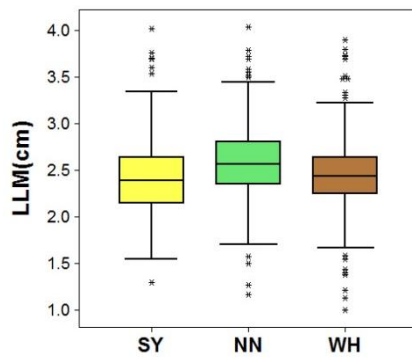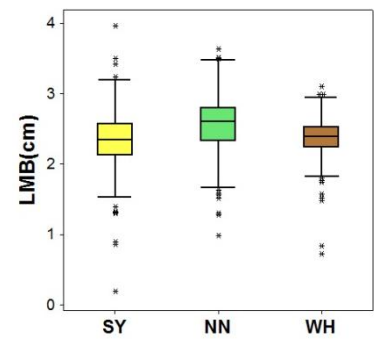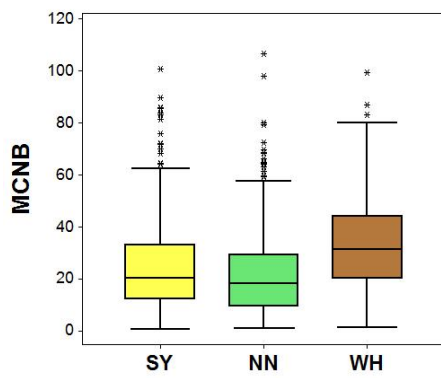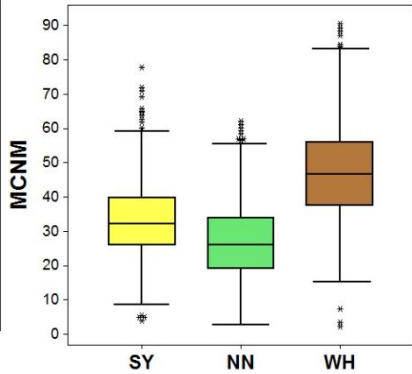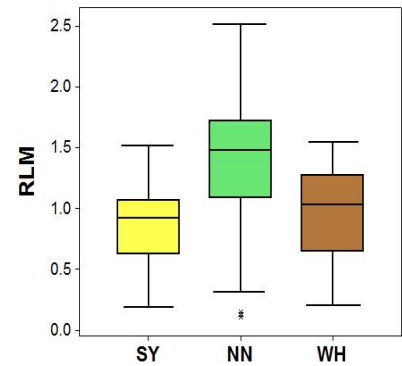

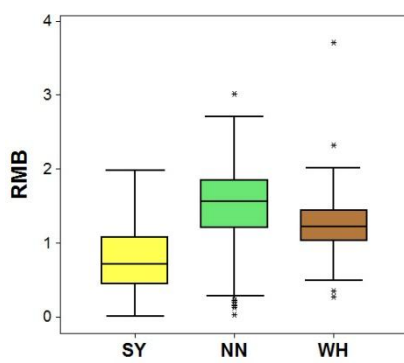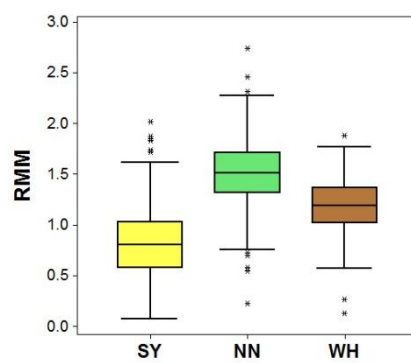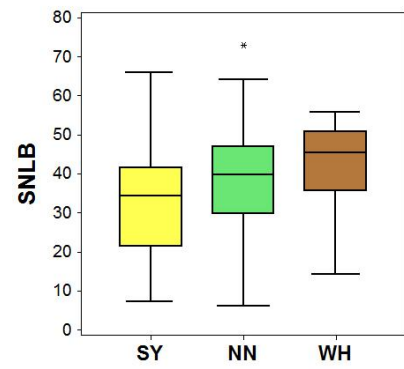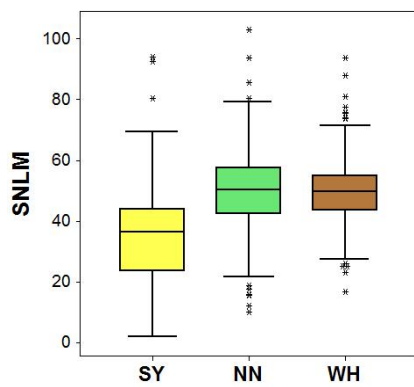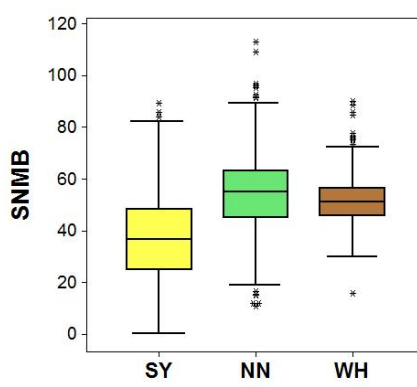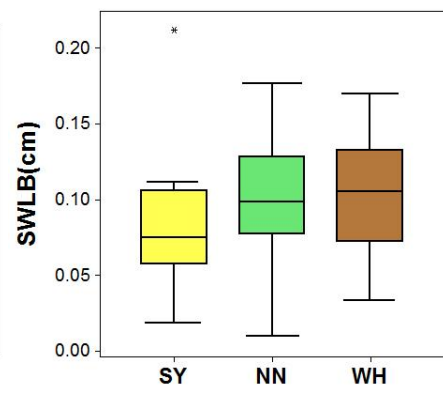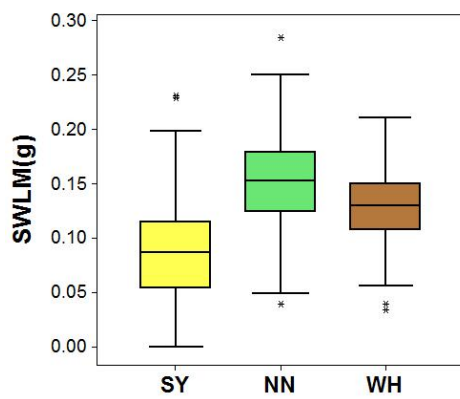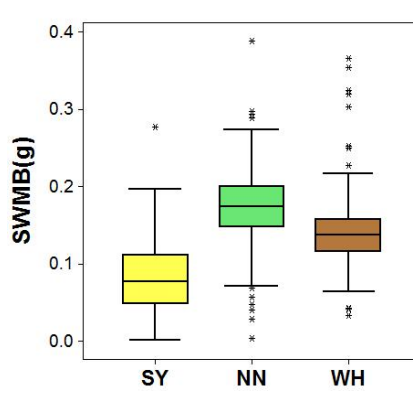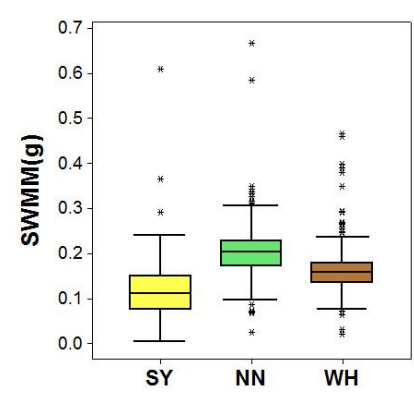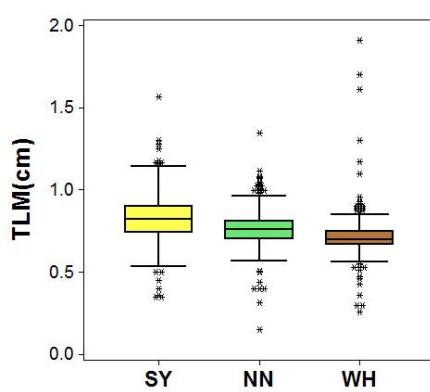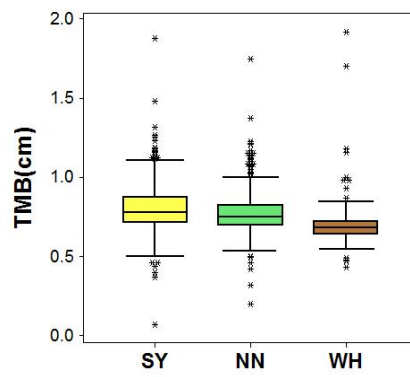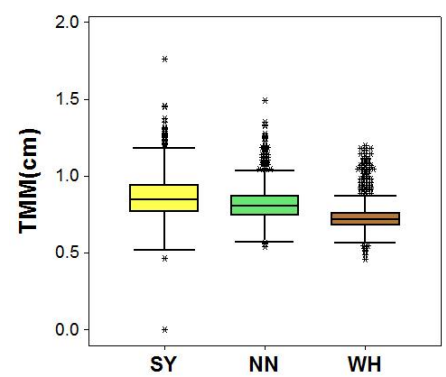

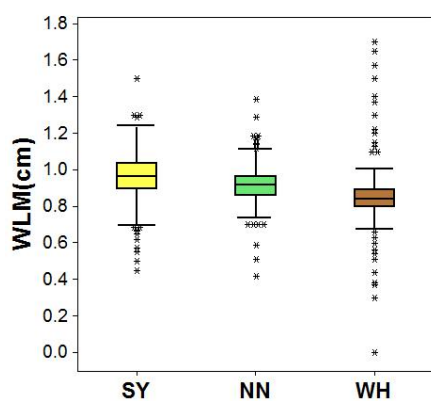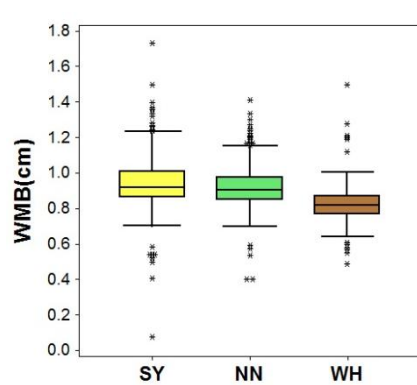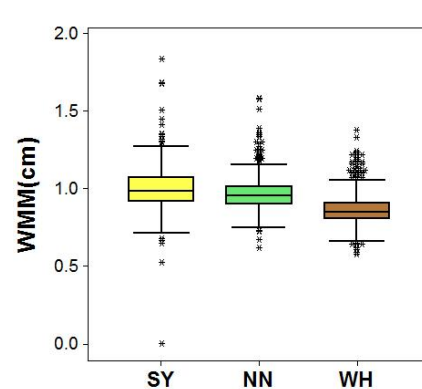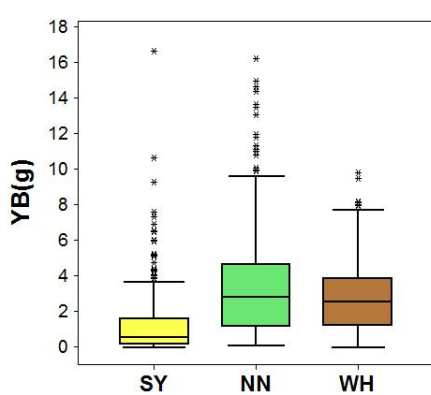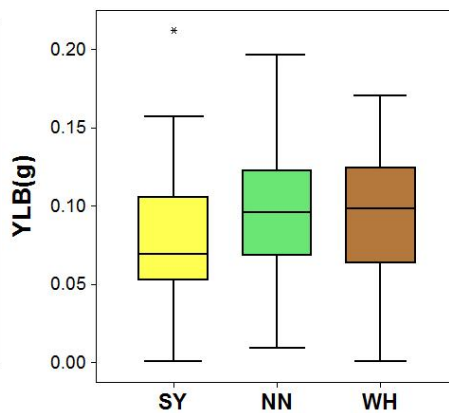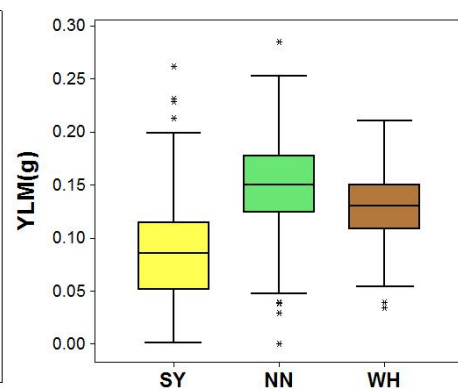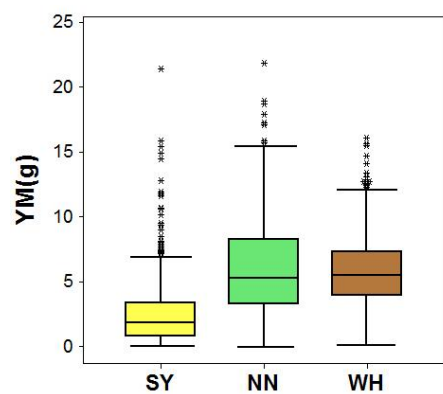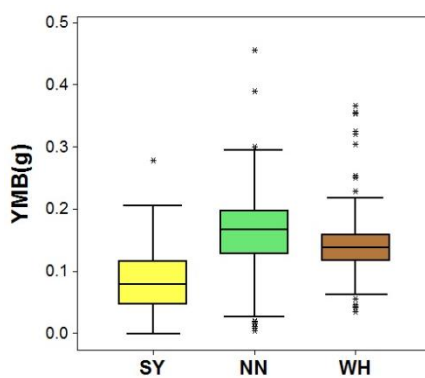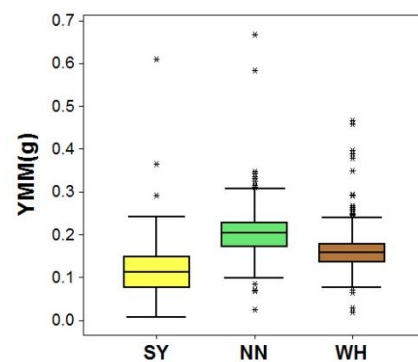

Supplement: s1 [file s1]
